1  
2  
3  
4  
5  
6  
7  
8  
9  
10  
11  
12  
13  
14  
15  
16  
17  
18  
19  
20  
21  
22  
23

**FARFAR2: Improved de novo Rosetta prediction of complex global  
RNA folds**

Andrew M. Watkins, Rhiju Das\*

Department of Biochemistry, Stanford University School of Medicine, Stanford, CA 94305,  
USA.

Correspondence: Rhiju Das ([rhiju@stanford.edu](mailto:rhiju@stanford.edu))

1 **Summary** [149 words current, 150 words maximum]

2 Methods to predict RNA 3D structures from sequence are needed to understand the exploding  
3 number of RNA molecules being discovered across biology. As assessed during community-  
4 wide RNA-Puzzles trials, Rosetta's Fragment Assembly of RNA with Full-Atom Refinement  
5 (FARFAR) enables accurate prediction of complex folds, but it remains unclear how much  
6 human intervention and experimental guidance is needed to achieve this performance. Here, we  
7 present FARFAR2, a protocol integrating recent innovations with updated RNA fragment  
8 libraries and helix modeling. In 16 of 21 RNA-Puzzles revisited without experimental data or  
9 expert intervention, FARFAR2 recovers structures that are more accurate than the original  
10 models submitted by our group and other participants during the RNA-Puzzles trials. In five  
11 prospective tests, pre-registered FARFAR2 models for riboswitches and adenovirus VA-I  
12 achieved 3–8 Å RMSD accuracies. Finally, we present a server and three large model archives  
13 (FARFAR2-Classics, FARFAR2-Motifs, and FARFAR2-Puzzles) to guide future applications  
14 and advances.

15

16 **Keywords:** RNA, structure prediction, fragment assembly, homology modeling, blind prediction

17

## 1 **Introduction**

2 Noncoding RNA molecules (ncRNA) are essential to biology's most critical and ancient  
3 functions, such as translation (the ribosome), splicing (the spliceosome), and control of gene  
4 expression levels (riboswitches) (Cech and Steitz, 2014). Many noncoding RNAs exhibit  
5 intricate three-dimensional folded structures, and orders of magnitude more sequences of  
6 biologically interesting RNAs have been determined than high-quality RNA structures. For  
7 example, there are the thousands of classes of RNA domains that have been curated in the  
8 RFAM database but that do not have experimentally solved structures (Kalvari et al., 2018).  
9 Therefore, computational methods to predict 3D ncRNA structure could be of substantial value.  
10 Current computational methods for 3D ncRNA structure prediction include coarse-grained MD  
11 simulation (Vfold3D (Zhao et al., 2017); iFoldRNA (Krokhotin et al., 2015)), coarse-grained  
12 Monte Carlo simulation (Rosetta FARFAR (Das and Baker, 2007) and SimRNA (Piatkowski et  
13 al., 2016)), and motif assembly (RNAComposer (Popenda et al., 2012); 3dRNA (Jian et al.,  
14 2017); MC-Fold (Parisien and Major, 2008)).

15  
16 Over the last 8 years, these methods have been tested and advanced through the RNA-Puzzles  
17 community-wide blind trials (Cruz et al., 2012; Miao et al., 2015, 2017). RNA modeling  
18 methods using the Rosetta software (Das and Baker, 2007; Das et al., 2010) motivated the launch  
19 of these trials (Sripakdeevong et al., 2012) and have achieved the most accurate models for the  
20 majority of cases to date (12 of 21), including ligand-binding riboswitches, ribozymes, and other  
21 noncoding RNAs with complex folds. The primary Rosetta modeling tool for RNA, called  
22 FARFAR (Fragment Assembly of RNA with Full-Atom Refinement), was inspired by Rosetta's  
23 protein structure prediction methods. FARFAR first models an RNA structure by stitching  
24 together 3-residue fragments of previously solved RNA structures whose sequence matches the  
25 target sequence. This Monte Carlo process is guided by a low-resolution score function that  
26 rewards base pairs and base stacks with geometries similar to those seen in previously solved  
27 RNA structures (Das and Baker, 2007). Then, each model is refined in a high-resolution all-atom  
28 free energy function that rewards hydrogen bonds, van der Waals packing of atoms, and other  
29 physically important interactions, and the lowest energy models are clustered to achieve  
30 submitted models (Cruz et al., 2012; Das et al., 2010; Miao et al., 2015, 2017).

31

1 While consistently successful in RNA-Puzzles, FARFAR modeling has involved problem-  
2 specific expert intuition, such as guesses of ligand binding sites based on inspection of  
3 alignments, as well as algorithmic extensions created ‘on-the-fly’ to explore novel ideas inspired  
4 by the targets (Cruz et al., 2012; Miao et al., 2015, 2017). As in early days of protein structure  
5 prediction (Sali, 1995; Simons et al., 1997), many of these steps have not been well documented,  
6 automated, or systematically benchmarked, even as FARFAR has been integrated into practical  
7 applications involving experimental data from NMR, chemical mapping, and cryo-EM (Cheng et  
8 al., 2015; Kappel et al., 2018; Sripakdeevong et al., 2014). Prior RNA-Puzzles results suggest  
9 that some FARFAR-based protocol may potentially have excellent accuracy for modeling  
10 complex RNA tertiary folds without experimental data, but the exact protocol and its ability to  
11 deliver consistent results remains uncertain due to lack of a systematic benchmark on state-of-  
12 the-art code (Ding et al., 2008; Laing and Schlick, 2010; Popena et al., 2012). Furthermore,  
13 without modeling pools associated with such a benchmark, groups developing complementary  
14 procedures, including recent scoring methods taking advantage of artificial neural networks and  
15 evolutionary coupling information (AlQuraishi, 2019; Li et al., 2019; Wang et al., 2019; Weinreb  
16 et al., 2016) and alternative high-resolution refinement procedures (Tan et al., 2018; Watkins et  
17 al., 2018), cannot easily test if their procedures might be pipelined with Rosetta FARFAR  
18 modeling.

19  
20 This paper seeks to address these gaps in Rosetta RNA modeling. First, we describe how  
21 improvement of the general Rosetta codebase as well as consolidation of the FARFAR protocol  
22 have enabled development of a streamlined version of the method, named FARFAR2, which we  
23 make available as a webserver on ROSIE at <https://rosie.rosettacommons.org/farfar2>. The  
24 method reproduces and extends prior results on two benchmarks of small RNA folds and RNA  
25 submotifs here revisited as the *FARFAR2-Classics* and *FARFAR2-Motifs* model sets. Second, we  
26 present benchmarks of FARFAR2 including, most importantly, a new benchmark that revisits  
27 every previous RNA-Puzzle for which there exists a final deposited structure. This *FARFAR2-*  
28 *Puzzles* benchmark uses only secondary structure information and template structures employed  
29 at the time of the original challenge. Finally, as rigorous validation, we present new blind tests of  
30 the method based on four independently solved structures of riboswitch aptamers based on cryo-  
31 EM maps (Kappel et al., 2019) and an adenoviral noncoding RNA presented as RNA-Puzzle 24

1 (Hood et al., 2019). The results confirm the ability of Rosetta FARFAR2 to recover complex  
2 global folds of RNAs while also highlighting current limitations of the method that will likely  
3 require complementary approaches to resolve. The input files and output models from this study  
4 – including over 10 million structures available in a single archive – provide a rich resource that  
5 we expect to be valuable in developing approaches that extend or go beyond Rosetta FARFAR2.

6

## 7 **Results**

### 8 Consolidated RNA fragment assembly protocol improves modeling of small RNAs

9 Our core goal in developing the Rosetta FARFAR2 protocol has been to achieve a single  
10 application that enables straightforward modeling of complex RNA structures with sizes up to  
11 200 nucleotides, incorporating any available additional knowledge. Previous attempts to  
12 construct a comprehensive modeling pipeline required several manual steps running a series of  
13 distinct Rosetta applications, such as pre-generating helix ensembles, set up through a separate  
14 Python script (Cheng et al., 2015; Watkins et al., 2019). The new FARFAR2 protocol is designed  
15 to instead take input information in as simple a manner as possible into a single Rosetta  
16 executable, *rna\_denovo*. Analogous to other RNA modeling packages (Krokhotin et al., 2015;  
17 Piatkowski et al., 2016; Popena et al., 2012), the *rna\_denovo* executable now accepts the RNA  
18 sequence, the RNA secondary structure in community-standard dot-parentheses notation, and, if  
19 available, the names of PDB-formatted files holding template structures of any known sub-  
20 motifs or sub-domains.

21

22 FARFAR2 also implements three methodological improvements. It uses an updated library of  
23 fragments, based on the non-redundant 2018 crystallographic database of 657 RNA structures  
24 (Leontis and Zirbel, 2012), which is 15% larger and more diverse than the previous updated  
25 fragment library from 2009 (Richardson et al., 2008). The protocol also implements a special set  
26 of Monte Carlo moves for nucleotides in stacked Watson-Crick pairs (“base pair steps”) that  
27 maintain Watson-Crick geometry of RNA helices while allowing their backbone conformations  
28 to be perturbed, drawing on the same crystallographic database (see Methods). Last, during the  
29 minimization stage, the protocol uses an updated all-atom free energy function developed in a  
30 recent study seeking high accuracy on small RNA noncanonical motifs (Watkins et al., 2018).

31

1 As initial tests of this FARFAR2 protocol, we measured its performance on two benchmarks  
2 involving small RNAs developed in prior work. We revisited the original Rosetta RNA  
3 benchmark of 18 small RNA problems (Das and Baker, 2007), generating a set of 25.2M total  
4 models (1.4M models per problem) that we term the *FARFAR2-Classics* data set. These results  
5 confirmed that the new fragment library, minimization score function, and mode of Watson-  
6 Crick base pair modeling give improved results over the original Rosetta fragment assembly  
7 method, with the most notable improvements arising from full-atom refinement (Figure S1). Full  
8 results are given in Table S2. We further assessed performance using the “native-like” standard  
9 applied in the original work (Das and Baker, 2007): achieving folds with RMSD to experimental  
10 structure of better than 4 Å in the top 5 cluster centers (5000 low-energy models clustered with a  
11 3.0 Å radius). By this metric, FARFAR2 succeeded in 15 of 18 cases, better than the original  
12 results of 10 of 18. Figure 2A-E shows native-like models achieved by FARFAR2 for the five  
13 cases for which the original study did not sample such folds. For 1A4D (Figure 2A), an NMR  
14 structure of the loop D/loop E arm of the E. coli 5S rRNA, the FARFAR2 model correctly  
15 recovers eleven consecutive base pairs, only one of which is a canonical Watson-Crick base pair.  
16 For 1CSL (Figure 2B), the HIV RRE high affinity site, FARFAR2 recovers an unusual bent  
17 geometry and both ‘bulged-out’ nucleotides. For 1I9X (Figure 2C), the branchpoint duplex from  
18 U2 snRNA, FARFAR2 recovers a nearly atomic-accuracy model (2.5 Å RMSD). For 1KKA  
19 (Figure 2D), an NMR structure of the unmodified anticodon stem-loop from tRNA-Phe,  
20 FARFAR2 obtains a model with a correct geometry for the unusually twisted helix, as well as a  
21 geometry for the apical loop that lacks several clashes present in the database-deposited  
22 coordinates. Finally, for 2A43 (Figure 2E), a pseudoknot from luteovirus, FARFAR2 recovers  
23 the A-minor motif that anchors the pseudoknot fold.

24  
25 As a higher resolution test, we evaluated FARFAR2 on a benchmark of noncanonical RNA  
26 motifs (apical loops, internal loops, junctions, and tertiary contacts) extracted from larger RNA  
27 structures (Das et al., 2010). Recently, we reported that a new nucleotide-by-nucleotide build-up  
28 method called stepwise Monte Carlo (SWM) outperformed FARFAR for intricate noncanonical  
29 loops (Watkins et al., 2018). However, for problems with longer loops or that require positioning  
30 of distinct helical elements in tertiary contacts, the SWM method transited through physically  
31 unreasonable intermediate conformations (Watkins et al., 2018), and FARFAR2 achieved better

1 RMSD accuracies than SWM in these cases. Here we revisited this comparison with FARFAR2;  
2 the resulting 820,000 models (10,000 models per problem) comprise the *FARFAR2-Motifs*  
3 dataset. As observed previously, SWM achieved a 1.5 Å model among the top 5 cluster centers  
4 in more problems than FARFAR2 (42 compared to 37 out of 82; see Figure S2 and methods for  
5 clustering details). Nevertheless, cases in which FARFAR2 outperformed SWM supported the  
6 continuing use of FARFAR2 for modeling complex RNA folds with long loops or tertiary  
7 contacts for which the partners' relative positions are uncertain (Figure 2F-J). An over-twisted  
8 helix P5b from the P4-P6 domain of *Tetrahymena* ribozyme, the loop E motif from *E. coli* 5S  
9 rRNA, and the kink-turn motif each involve concomitant modeling of two strands with lengths  
10 up to 9 nucleotides, and SWM had difficulty building up complete solutions for these loops (best  
11 cluster center RMSDs of 2.7 Å, 1.7 Å, and 2.1 Å, respectively). In contrast, the best of five  
12 cluster centers from FARFAR2 did achieve sub-Angstrom recovery of these motifs (0.76 Å, 0.72  
13 Å, and 0.97 Å RMSD, respectively; Figures 2F-H). For tertiary contacts in which the relative  
14 positioning of partners had to be modeled *de novo*, current SWM procedures for docking the  
15 partner segments gave poor accuracies, e.g., for an A-minor tertiary contact from the lariat-  
16 capping GIR1 ribozyme and from the tetraloop-receptor contact of the P4-P6 RNA (1.8 Å and  
17 3.0 Å, respectively). Fragment-based FARFAR2 recovered these structures with excellent  
18 accuracies of 1.2 Å and 0.81 Å RMSD, respectively (Figures 2I-J). Because such long-looped  
19 junctions and tertiary contacts appear frequently in complex RNA folds, these results have  
20 motivated us to continue to develop FARFAR2 as our default procedure for such modeling cases  
21 (Watkins et al., 2018, 2019).

22

### 23 The RNA-puzzles benchmark.

24 The findings above on prediction accuracies for small RNAs and RNA motifs motivated us to  
25 test FARFAR2 against larger RNA structures with many motifs and complex folds. Through  
26 years of participation in the RNA-puzzles trials (Cruz et al., 2012; Miao et al., 2015, 2017), we  
27 have kept records of our strategies for each prediction challenge, including secondary structure  
28 predictions, inferences based on homology to prior deposited structures, and functional  
29 constraints, such as sites of self-cleavage in ribozyme challenges. We ran FARFAR2 for each of  
30 the 21 problems for which an experimental structure is now available. This set comprised all  
31 RNA-Puzzles from RNA-Puzzle 1 through RNA-Puzzle 21 except RNA-Puzzle 15 and treated

1 bound and unbound states of RNA-Puzzle 14 (a riboswitch aptamer for glutamine) as separate  
2 problems. Consequently, the benchmark included both single- and multi-stranded RNAs, as well  
3 as problems for which considerable homology was available and puzzles where we had to start  
4 from only secondary structure information (Table S3). We made no explicit provision for ligand  
5 binding, save implicitly when the ligand binding site was part of a template structure, since  
6 augmenting the low-resolution fragment assembly stage of modeling with a concurrent ligand  
7 docking protocol would require substantial additions to the FARFAR2 algorithm.

8  
9 Our primary question was whether FARFAR2 samples native-like global folds within parts of  
10 models of the typical size we would generate for blind modeling challenges. For each of the  
11 RNA-Puzzles, we therefore generated 3000-30,000 FARFAR2 models, involving approximately  
12 6-48 hours of computation on 500 CPUs. In typical modeling scenarios, we would inspect  
13 approximately 100-200 low energy models as potential candidates for submission, corresponding  
14 to the lowest 1% of models by Rosetta all-atom energy. To assess whether any of the large RNA  
15 models were native-like, we translated the 4.0 Å RMSD threshold used in our assessment of the  
16 smaller RNAs of the FARFAR2-Classics to these new challenges, making use of a previous  
17 extension to the length-independent RMSD<sub>100</sub> metric (Carugo and Pongor, 2008; Kappel and  
18 Das, 2019). A 4.0 Å RMSD on FARFAR2-Classics (median length 26 nt, all of which are built  
19 *de novo*) is equivalent to a 9.1 Å RMSD on FARFAR2-Puzzles (median length 71 nt that need to  
20 be built *de novo*); see STAR Methods. Most problems were close to the median length, but the  
21 three longest problems are substantially longer (117, 130, 185 nucleotides must be built for  
22 RNA-Puzzles 12, 5, and 7 respectively), and, applying the same transformation, we used 13.8 Å  
23 RMSD to assess whether models of these longest problems were native-like.

24  
25 Using these evaluation criteria, the FARFAR2 protocol is able to sample native-like models  
26 within its top 1% of models by predicted energy for 19 of 21 cases. The agreement across all  
27 cases is unusually striking, as shown in Figure 3. In 16 of 21 RNA-Puzzles, FARFAR2 samples  
28 a model within its best 1% by energy (30–300 models) closer to native than the best originally  
29 submitted model during the actual RNA-Puzzles trial (20-100 models; Table 1, Figure 3). In two  
30 additional cases, FARFAR2 outperforms any previous Das lab submission but not the very best  
31 model overall; detailed depictions of prior models in Figure S3. These results indicate that



1 FARFAR2 emulates or exceeds prior performance in RNA-Puzzles, and specific cases illustrate  
2 how this was achieved. In the FARFAR2 model of RNA-Puzzle 6 (Figure 4F), an  
3 adenosylcobalamin riboswitch, and of RNA-Puzzle 7 (Figure 4G), the VS ribozyme, the global  
4 fold of both RNAs is recapitulated accurately up to one missed inter-helical angle; that level of  
5 accuracy is in part enabled by slightly altered helical geometries not found in the original  
6 submissions (Figure S4). Marked improvement is also seen in several ribozyme structures of  
7 moderate size (Puzzles 15, 17, 19, 20). These molecules – a hammerhead and pistol ribozyme  
8 and two bimolecular twister sister constructs – each feature a highly compact multiway junction  
9 and a key tertiary contact. The pistol ribozyme features a pseudoknot, while the other three  
10 possess intercalated T-loops, and combined with other interconnections, these features lead to  
11 slight under- or over-twisting of helices. These observations suggested that the improvements  
12 seen in FARFAR2 relative to the original RNA-Puzzles submissions might be due to  
13 improvements in helix modeling through “base pair step” fragments. Additional tests using  
14 previous helix modeling procedures confirmed the importance of this new helix modeling  
15 scheme (Figure S5).

16  
17 In 5 of 21 modeling challenges, FARFAR2 did not sample among its top 1% by energy a more  
18 accurate model than the original RNA-Puzzles submissions. RNA-Puzzles 12, 13, 14 (bound),  
19 and 21 represent structures of riboswitch aptamers with their small molecule ligands (cyclic  
20 diAMP, ZMP, glutamine, and guanidinium, respectively). For each of these cases, the original  
21 modeling required extensive manual curation as well as experimentally derived constraints or  
22 explicit modeling of the ligand binding site (Miao et al., 2017). Finally, the best Das lab model  
23 for RNA-Puzzle 18, the Zika xrRNA, was solved with the stepwise Monte Carlo method  
24 (Watkins et al., 2018); FARFAR2 does outperform the best original Das lab FARFAR model.  
25 These results indicate that FARFAR2 successfully automates the many *ad hoc* steps used in prior  
26 RNA-Puzzles challenges but could be improved further if ligand binding hypotheses and  
27 stepwise Monte Carlo could be incorporated into the modeling.

28  
29 To compare FARFAR2 results to the original RNA-Puzzle submission process more directly, we  
30 needed some method of model selection to obtain a final set of ten from the ensemble of sampled  
31 models. Here, we reproduced the prior protocol for analyzing problems of this size within

1 Rosetta, clustering the top 400 models with a 5.0 Å cluster radius. (Alternative clustering  
2 methods gave similar or slightly worse results; see Methods.) The best of ten clustered  
3 FARFAR2 models outperformed the original Das lab submission in 10 of 21 cases, and, despite  
4 no manual intervention in model selection, was less than 1.0 Å worse in RMSD in an additional  
5 4. Furthermore, these selected models were native-like (RMSD accuracy better than 9.1 Å for  
6 short problems or 13.8 Å for long problems) in 16 of 21 cases.

7  
8 In an actual blind modeling scenario, modelers may want to know how accurate their ensemble  
9 of FARFAR2 models is likely to be. Recently, extensions of FARFAR to building coordinates  
10 into RNA-protein (Kappel et al., 2018) and RNA-only electron density maps (Kappel et al.,  
11 2019) have suggested a promising approach. In those settings, the average pairwise RMSD  
12 between the ten lowest energy models was highly predictive of the average RMSD to native of  
13 those same ten models. We tested whether a similar relationship would apply in this setting – in  
14 the absence of electron density, where models are significantly more diverse. As shown in Figure  
15 5, the average pairwise RMSD of the top 10 FARFAR2 cluster centers does correlate well with  
16 the average RMSD to native of those models ( $R^2$  of 0.84). The correlation is weaker than that  
17 observed in density guided modeling (grey points, Figure 5,  $R^2$  of 0.94), and the trend is shifted  
18 higher so that the same inter-model RMSD corresponds to a worse average RMSD-to-native in  
19 the density-free FARFAR2 cases. Nevertheless, the error in the above estimate is itself  
20 predictable; the standard deviation of the pairwise RMSDs among top-10 models predicts most  
21 of the variance in the RMSD to native among those models (with electron density,  $R^2 = 0.90$ ;  
22 without,  $R^2 = 0.64$ ). These relationships suggested that we would be able to predict ranges of  
23 model accuracy in real, blind prediction scenarios, a prospect that we tested in our final study.

## 1 New blind predictions of five RNA structures

2 After confirming modeling accuracy of FARFAR2 in the retrospective benchmarks above, we  
3 sought to validate that the FARFAR2 method was similarly effective in truly blind modeling  
4 challenges. In separate work, we have developed a pipeline for highly accurate, rapid solution of  
5 complex RNA folds using a battery of cryo-EM, multidimensional chemical mapping, and  
6 automated computational modeling (Kappel et al., 2018, 2019). We saw this as a valuable  
7 opportunity to conduct a battery of blind challenges of the FARFAR2 method. We applied  
8 FARFAR2 to predict the structures of four natural RNAs – two tandem glycine riboswitches, the  
9 S-adenosyl methionine binding SAM-IV riboswitch, and an adenoviral noncoding RNA virus-  
10 associated (VA) RNA I (Hood et al., 2019) – and a *de novo* designed RNA, a Spinach binding  
11 aptamer (Laing and Schlick, 2011). These modeling challenges were carried out fully blindly of  
12 experimental efforts by author A.M.W.; resulting models were pre-registered with the Open  
13 Science Framework (OSF) in the case of the Spinach aptamer and two glycine riboswitches;  
14 submitted to an “Unknown RFam” RNA-Puzzles challenge in the case of SAM-IV; and  
15 submitted to RNA-Puzzle 24 for VA RNA I.

16  
17 The results of these five blind challenges supported the accuracy of FARFAR2 in a wide range  
18 of template-based modeling and fully *de novo* modeling scenarios. The three natural riboswitch  
19 aptamers tested use of FARFAR2 in problems where templates were available but peripheral  
20 tertiary domains needed to be built *de novo*. We used a 122 nt template derived from a crystal  
21 structure (PDB ID: 3P49) to build a series of models of the full-length 167 nt *F. nucleatum*  
22 riboswitch (Figure 5A). This template structure previously included a U1 binding loop to  
23 facilitate crystallization, which we replaced with the native sequence; it had also omitted a  
24 predicted 9-nt kink-turn linker between its two glycine-sensing domains, requiring the deletion  
25 and FARFAR2 remodeling of the first eighteen nt on the 5' end, nt 72-91, and the three final 3'  
26 nt, 165-167. We subsequently used part of the lowest-energy *F. nucleatum* solution, threaded  
27 with the related sequence from *V. cholerae*, to predict the structure of the 229 nt *V. cholerae*  
28 tandem glycine riboswitch, using FARFAR2 to insert a P4 stem into a multiloop of the 5'-  
29 aptamer domain and substantially remodel the resulting fold (Figure 5B). Our strategy for the  
30 SAM-IV riboswitch used a template 23-nt S-adenosyl methionine binding site from the SAM-I  
31 riboswitch (PDB ID: 2YGH) and largely followed our previously described procedure for

1 homology modeling of complex RNA folds (Watkins et al., 2019), but used the FARFAR2  
2 protocol instead, thus using base pair step sampling and the new fragment library in addition to  
3 the updated energy function for full-atom refinement (Figure 5C). We modeled the Spinach  
4 stabilizing aptamer Spinach-TTR-3 by employing as templates the pre-formed ideal  
5 tetraloop/receptor interaction from a P4-P6 RNA crystal structure (PDB ID: 1GID) and the  
6 DFHBI/Spinach binding site (PDB ID: 4TS2; Figure 6D). Finally, for the VA RNA I, no  
7 template structures were available, so we used only the literature secondary structure  
8 (Dzananovic et al., 2017). Upon unblinding, the modeling clearly recapitulated the global folds  
9 of the RNAs solved independently with experimental cryo-EM and mutate-and-map data (Figure  
10 6). Using the same model selection procedure as for FARFAR2-Puzzles, we chose 10 models for  
11 each problem except the SAM-IV riboswitch, for which we could submit only 5 models. The  
12 best submitted FARFAR2 models were a 3.0 Å prediction of the *F. nucleatum* glycine riboswitch  
13 (2.2 Å over residues modeled directly), a 4.3 Å prediction of the *V. cholerae* glycine riboswitch,  
14 a 3.2 Å prediction of SAM-IV, a 6.7 Å prediction of the Spinach stabilizer (which was only  
15 determined without the ligand bound), and a 7.7 Å prediction of the VA RNA I (Table 2).  
16 Especially encouragingly, the average model accuracies were similar to predicted values: based  
17 on the mean inter-model RMSDs and the trends of Figure 5, 4.8 Å, 5.9 Å, 8.8 Å, 9.3 Å, and 13.7  
18 Å compared to  $4.9 \pm 0.43$  Å,  $7.1 \pm 1.9$  Å,  $12.7 \pm 6.0$  Å,  $11.1 \pm 2.9$  Å, and  $13.3 \pm 3.4$  Å,  
19 respectively. The average model was somewhat more accurate than predicted in particular for  
20 SAM-IV (8.8 Å vs  $12.7 \pm 6.0$  Å) and Spinach-TTR-3 (9.3 Å vs.  $11.1 \pm 2.9$  Å), but still within the  
21 range expected from the variance of FARFAR2 inter-model RMSDs.

22

## 23 Discussion

24 We have developed and benchmarked a major update to Rosetta fragment assembly of RNA with  
25 full-atom refinement (FARFAR2), which automates multiple steps of previous protocols and  
26 brings to bear an updated fragment library, flexible treatment of helix base pair steps, and a  
27 refined all-atom score function. We find that FARFAR2 achieves native-like structure models on  
28 three retrospective benchmarks including 18 small RNAs, 82 ‘motif-scale’ challenges, and 21  
29 RNA-Puzzles, as well as on five new prospective blind challenges, including RNA-Puzzle 24.

30

1 Fragment assembly methods have been a classic method for structure prediction because of their  
2 simple theoretical justification: folded biomolecules occupy a special region of conformational  
3 space, and new molecules will locally resemble previously determined structures. Fragment-  
4 based methods yield reliable predictions of RNA structure, and FARFAR2's extensions to this  
5 system – enabling kinematically realistic helix flexibility, expanding the database of  
6 crystallographic fragments, and scoring function improvements – have measurably improved its  
7 performance. Without requiring human intervention following template selection, FARFAR2  
8 routinely samples native-like folds within its 1% lowest energy structures. These structures are  
9 consistently more accurate than the best original Das lab submissions and, in the majority of  
10 cases, more accurate than the best overall submission. Model selection based on clustering the  
11 lowest energy models appears generally successful, although our benchmark highlights cases  
12 where highly accurate models (Figure 3) are not captured by clustering. The convergence of the  
13 top ten cluster centers serves as a predictor of overall modeling accuracy. When applied to five  
14 new blind challenges, FARFAR2 achieved five blind predictions obtaining 3–8 Å accuracy on  
15 newly built residues, showing strong agreement with subsequently solved structures from  
16 cryoelectron microscopy and crystallography and confirming accuracy estimates made during  
17 modeling. FARFAR2 appears well-poised to make predictions for RNA challenges in which  
18 secondary structure and some tertiary contact information (e.g., pseudoknots) are available.  
19 Convergence-based accuracy estimates should help guide the interpretation of the models and  
20 point to cases where more experimental data are required.

21  
22 The frontiers for accurate RNA 3D structure prediction involve modeling larger problems (more  
23 than 100 nucleotides of unknown tertiary structure, illustrated here by RNA-Puzzles 12, 5, and 7,  
24 Figure 4) and problems in which very high accuracy is required (e.g., if the structure is required  
25 for subsequent ligand docking or drug design). Fully automated methods that more accurately  
26 solve subproblems at the expense of more computation, such as stepwise Monte Carlo (Watkins  
27 et al., 2018), may bridge these gaps if pipelined with fragment assembly, as may methods that  
28 make more active use of residue contact inference from sequence covariation (Weinreb et al.,  
29 2016) or artificial neural networks (AlQuraishi, 2019; Li et al., 2019). Beyond the FARFAR2  
30 algorithm itself, which enables largely automated prediction of RNA structure with good  
31 accuracy, this benchmark system and the associated 'decoy' models in the FARFAR2-Classics,

1 FARFAR2-Motifs, and FARFAR2-Puzzles data sets can serve as starting points for the  
2 development of the next generation of high-resolution structure prediction algorithms.

3

#### 4 **Acknowledgements**

5 We thank K. Kappel, Z. Su, K. Zhang, and W. Chiu (Stanford) for independent structure  
6 determination of three new blind challenges. We thank Z. Miao and E. Westhof for organizing  
7 the RNA-puzzles and ‘Unknown RFam’ challenges. We acknowledge funding from the National  
8 Institutes of Health (R21 CA219847 and R35 GM122579) and the Army Research Office  
9 W911NF-16-1-0372.

10

#### 11 **Author Contributions**

12 Conceptualization, A.M.W. and R.D.; Methodology, A.M.W. and R.D.; Investigation, A.M.W.;  
13 Writing – Original Draft, A.M.W.; Writing – Review & Editing, A.M.W. and R.D.; Funding  
14 Acquisition, R.D.; Resources, R.D.; Supervision, R.D.

15

#### 16 **Declaration of Interests**

17 The authors declare no competing interests.

18

#### 19 **References**

20 Akiyama, B.M., Laurence, H.M., Massey, A.R., Costantino, D.A., Xie, X., Yang, Y., Shi, P.Y.,  
21 Nix, J.C., Beckham, J.D., and Kieft, J.S. (2016). Zika virus produces noncoding RNAs using a  
22 multi-pseudoknot structure that confounds a cellular exonuclease. *Science* 354, 1148–1152.  
23 AlQuraishi, M. (2019). End-to-End Differentiable Learning of Protein Structure. *Cell Syst.* 8,  
24 292–301.  
25 Amarasinghe, G.K., De Guzman, R.N., Turner, R.B., Chancellor, K.J., Wu, Z.R., and Summers,  
26 M.F. (2000). NMR structure of the HIV-1 nucleocapsid protein bound to stem-loop SL2 of the  
27  $\Psi$ -RNA packaging signal. Implications for genome recognition. *J. Mol. Biol.* 301, 491–511.  
28 Baeyens, K.J., De Bondt, H.L., Pardi, A., and Holbrook, S.R. (1996). A curved RNA helix  
29 incorporating an internal loop with G·A and A·A non-Watson-Crick base pairing. *Proc. Natl.*  
30 *Acad. Sci. U. S. A.* 93, 12851–12855.  
31 Baird, N.J., Zhang, J., Hamma, T., and Ferré-D’Amaré, A.R. (2012). YbxF and YlxQ are

- 1 bacterial homologs of L7Ae and bind K-turns but not K-loops. *RNA* 18, 759–770.
- 2 Berglund, J.A., Rosbash, M., and Schultz, S.C. (2001). Crystal structure of a model branchpoint-
- 3 U2 snRNA duplex containing bulged adenosines. *RNA* 7, 682–691.
- 4 Butler, E.B., Xiong, Y., Wang, J., and Strobel, S.A. (2011). Structural basis of cooperative ligand
- 5 binding by the glycine riboswitch. *Chem. Biol.* 18, 293–298.
- 6 Cabello-Villegas, J., Winkler, M.E., and Nikonowicz, E.P. (2002). Solution conformations of
- 7 unmodified and A37N6-dimethylallyl modified anticodon stem-loops of *Escherichia coli*
- 8 tRNA<sup>phe</sup>. *J. Mol. Biol.* 319, 1015–1034.
- 9 Carugo, O., and Pongor, S. (2008). A normalized root-mean-square distance for comparing
- 10 protein three-dimensional structures. *Protein Sci.* 10, 1470–1473.
- 11 Cate, J.H., Gooding, A.R., Podell, E., Zhou, K., Golden, B.L., Kundrot, C.E., Cech, T.R., and
- 12 Doudna, J.A. (1996). Crystal structure of a group I ribozyme domain: Principles of RNA
- 13 packing. *Science* 273, 1678–1685.
- 14 Cech, T.R., and Steitz, J.A. (2014). The noncoding RNA revolution - Trashing old rules to forge
- 15 new ones. *Cell* 157, 77–94.
- 16 Cheng, C.Y., Chou, F.C., Kladwang, W., Tian, S., Cordero, P., and Das, R. (2015). Consistent
- 17 global structures of complex RNA states through multidimensional chemical mapping. *Elife* 4,
- 18 e07600.
- 19 Correll, C.C., Beneken, J., Plantinga, M.J., Lubbers, M., and Chan, Y.L. (2003). The common
- 20 and the distinctive features of the bulged-G motif based on a 1.04 Å resolution RNA structure.
- 21 *Nucleic Acids Res.* 31, 6806–6818.
- 22 Cruz, J.A., Blanchet, M.F., Boniecki, M., Bujnicki, J.M., Chen, S.J., Cao, S., Das, R., Ding, F.,
- 23 Dokholyan, N. V., Flores, S.C., et al. (2012). RNA-Puzzles: A CASP-like evaluation of RNA
- 24 three-dimensional structure prediction. *RNA* 18, 610–625.
- 25 Dallas, A., and Moore, P.B. (1997). The loop E-loop D region of *Escherichia coli* 5S rRNA: The
- 26 solution structure reveals an unusual loop that may be important for binding ribosomal proteins.
- 27 *Structure* 5, 1639–1653.
- 28 Das, R., and Baker, D. (2007). Automated de novo prediction of native-like RNA tertiary
- 29 structures. *Proc. Natl. Acad. Sci. U. S. A.* 104, 14664–14669.
- 30 Das, R., Karanicolas, J., and Baker, D. (2010). Atomic accuracy in predicting and designing
- 31 noncanonical RNA structure. *Nat. Methods* 7, 291–294.

- 1 Dibrov, S., McLean, J., and Hermann, T. (2011a). Structure of an RNA dimer of a regulatory  
2 element from human thymidylate synthase mRNA. *Acta Crystallogr. Sect. D Biol. Crystallogr.*  
3 *67*, 97–104.
- 4 Dibrov, S.M., McLean, J., Parsons, J., and Hermann, T. (2011b). Self-assembling RNA square.  
5 *Proc. Natl. Acad. Sci. U. S. A.* *108*, 6405–6408.
- 6 Ding, F., Sharma, S., Chalasani, P., Demidov, V. V., Broude, N.E., and Dokholyan, N. V.  
7 (2008). Ab initio RNA folding by discrete molecular dynamics: From structure prediction to  
8 folding mechanisms. *RNA* *14*, 1164–1173.
- 9 Dzananovic, E., Astha, Chojnowski, G., Deo, S., Booy, E.P., Padilla-Meier, P., McEleney, K.,  
10 Bujnicki, J.M., Patel, T.R., and McKenna, S.A. (2017). Impact of the structural integrity of the  
11 three-way junction of adenovirus VAI RNA on PKR inhibition. *PLoS One* *12*, e0186849.
- 12 Egli, M., Minasov, G., Su, L., and Rich, A. (2002). Metal ions and flexibility in a viral RNA  
13 pseudoknot at atomic resolution. *Proc. Natl. Acad. Sci. U. S. A.* *99*, 4302–4307.
- 14 Finger, L.D., Trantirek, L., Johansson, C., and Feigon, J. (2003). Solution structures of stem-loop  
15 RNAs that bind to the two N-terminal RNA-binding domains of nucleolin. *Nucleic Acids Res.*  
16 *31*, 6461–6472.
- 17 Hofacker, I.L., and Lorenz, R. (2014). Predicting RNA structure: Advances and limitations.  
18 *Methods Mol. Biol.* *1086*, 1–19.
- 19 Holbrook, S.R., Cheong, C., Tinoco, I., and Kim, S.H. (1991). Crystal structure of an RNA  
20 double helix incorporating a track of non-Watson-Crick base pairs. *Nature* *353*, 579–581.
- 21 Hood, I. V, Gordon, J.M., Bou-Nader, C., Henderson, F.E., Bahmanjah, S., and Zhang, J. (2019).  
22 Crystal structure of an adenovirus virus-associated RNA. *Nat. Commun.* *10*, 2871.
- 23 Huang, L., Serganov, A., and Patel, D.J. (2010). Structural Insights into Ligand Recognition by a  
24 Sensing Domain of the Cooperative Glycine Riboswitch. *Mol. Cell* *40*, 774–786.
- 25 Huang, L., Wang, J., Wilson, T.J., and Lilley, D.M.J. (2017). Structure of the Guanidine III  
26 Riboswitch. *Cell Chem. Biol.* *24*, 1407-1415.e2.
- 27 Ippolito, J.A., and Steitz, T.A. (2000). The structure of the HIV-1 RRE high affinity Rev binding  
28 site at 1.6 Å resolution. *J. Mol. Biol.* *295*, 711–717.
- 29 Jian, W., Mao, K., Zhao, Y., Chen, Z., Jianjin, X., Yi, Z., and Xiao, Y. (2017). Optimization of  
30 RNA 3D structure prediction using evolutionary restraints of nucleotide-nucleotide interactions  
31 from direct coupling analysis. *Nucleic Acids Res.* *45*, 6299–6309.



- 1 Kacer, V., Scaringe, S.A., Scarsdale, J.N., and Rife, J.P. (2003). Crystal structures of  
2 r(GGUCACAGCCC)2. *Acta Crystallogr. - Sect. D Biol. Crystallogr.* *59*, 423–432.
- 3 Kalvari, I., Argasinska, J., Quinones-Olvera, N., Nawrocki, E.P., Rivas, E., Eddy, S.R., Bateman,  
4 A., Finn, R.D., and Petrov, A.I. (2018). Rfam 13.0: Shifting to a genome-centric resource for  
5 non-coding RNA families. *Nucleic Acids Res.* *46*, D335–D342.
- 6 Kappel, K., and Das, R. (2019). Sampling Native-like Structures of RNA-Protein Complexes  
7 through Rosetta Folding and Docking. *Structure* *27*, 140–151.
- 8 Kappel, K., Liu, S., Larsen, K.P., Skinnotis, G., Puglisi, E.V., Puglisi, J.D., Zhou, Z.H., Zhao, R.,  
9 and Das, R. (2018). De novo computational RNA modeling into cryo-EM maps of large  
10 ribonucleoprotein complexes. *Nat. Methods* *15*, 947–954.
- 11 Kappel, K., Zhang, K., Su, Z., Kladwang, W., Li, S., Pintilie, G., Topkar, V. V., Rangan, R.,  
12 Zheludev, I.N., Watkins, A.M., et al. (2019). Ribosolve: Rapid determination of three-  
13 dimensional RNA-only structures. *BioRxiv*, <https://doi.org/10.1101/717801>.
- 14 Krokhotin, A., Houlihan, K., and Dokholyan, N. V. (2015). iFoldRNA v2: Folding RNA with  
15 constraints. *Bioinformatics* *31*, 2891–2893.
- 16 Laing, C., and Schlick, T. (2010). Computational approaches to 3D modeling of RNA. *J. Phys.*  
17 *Condens. Matter* *22*.
- 18 Laing, C., and Schlick, T. (2011). Computational approaches to RNA structure prediction,  
19 analysis, and design. *Curr. Opin. Struct. Biol.* *21*, 306–318.
- 20 Leonard, G.A., McAuley-Hecht, K.E., Ebel, S., Lough, D.M., Brown, T., and Hunter, W.N.  
21 (1994). Crystal and molecular structure of r(CGCGAAUUAGCG): an RNA duplex containing  
22 two G(anti)·A(anti) base pairs. *Structure* *2*, 483–494.
- 23 Leontis, N.B., and Zirbel, C.L. (2012). Nonredundant 3D Structure Datasets for RNA  
24 Knowledge Extraction and Benchmarking. In *RNA 3D Structure Analysis and Prediction*, E.  
25 Westhof, and N.B. Leontis, eds. (Berlin, Heidelberg: Springer), pp. 281–298.
- 26 Li, Y., Hu, J., Zhang, C., Yu, D.-J., and Zhang, Y. (2019). ResPRE: high-accuracy protein  
27 contact prediction by coupling precision matrix with deep residual neural networks.  
28 *Bioinformatics* *btz291*.
- 29 Liu, Y., Wilson, T.J., and Lilley, D.M.J. (2017). The structure of a nucleolytic ribozyme that  
30 employs a catalytic metal ion. *Nat. Chem. Biol.* *13*, 508–513.
- 31 Martinez-Zapien, D., Legrand, P., McEwen, A.G., Proux, F., Cragolini, T., Pasquali, S., and

- 1 Dock-Bregeon, A.C. (2017). The crystal structure of the 5' functional domain of the transcription  
2 riboregulator 7SK. *Nucleic Acids Res.*
- 3 Mathews, D.H. (2006). RNA secondary structure analysis using RNAstructure. *Curr. Protoc.*  
4 *Bioinforma.* *13*, Pages 12.6.1-12.6.14.
- 5 Meyer, M., Nielsen, H., Oliéric, V., Roblin, P., Johansen, S.D., Westhof, E., and Masquida, B.  
6 (2014). Speciation of a group I intron into a lariat capping ribozyme. *Proc. Natl. Acad. Sci. U. S.*  
7 *A.* *111*, 7659–7664.
- 8 Miao, Z., Adamiak, R.W., Blanchet, M.F., Boniecki, M., Bujnicki, J.M., Chen, S.J., Cheng, C.,  
9 Chojnowski, G., Chou, F.C., Cordero, P., et al. (2015). RNA-Puzzles Round II: assessment of  
10 RNA structure prediction programs applied to three large RNA structures. *RNA* *21*, 1066–1084.
- 11 Miao, Z., Adamiak, R.W., Antczak, M., Batey, R.T., Becka, A.J., Biesiada, M., Boniecki, M.J.,  
12 Bujnicki, J.M., Chen, S.J., Cheng, C.Y., et al. (2017). RNA-Puzzles Round III: 3D RNA  
13 structure prediction of five riboswitches and one ribozyme. *RNA* *23*, 655–672.
- 14 Mir, A., Chen, J., Robinson, K., Lendy, E., Goodman, J., Neau, D., and Golden, B.L. (2015).  
15 Two Divalent Metal Ions and Conformational Changes Play Roles in the Hammerhead  
16 Ribozyme Cleavage Reaction. *Biochemistry* *54*, 6369–6381.
- 17 Pallan, P.S., Marshall, W.S., Harp, J., Jewett, F.C., Wawrzak, Z., Brown, B.A., Rich, A., and  
18 Egli, M. (2005). Crystal structure of a luteoviral RNA pseudoknot and model for a minimal  
19 ribosomal frameshifting motif. *Biochemistry* *44*, 11315–11322.
- 20 Pan, B., Shi, K., and Sundaralingam, M. (2006). Crystal Structure of an RNA Quadruplex  
21 Containing Inosine Tetrad: Implications for the Roles of NH<sub>2</sub> Group in Purine Tetrads. *J. Mol.*  
22 *Biol.* *363*, 451–459.
- 23 Parisien, M., and Major, F. (2008). The MC-Fold and MC-Sym pipeline infers RNA structure  
24 from sequence data. *Nature* *452*, 51–55.
- 25 Peselis, A., and Serganov, A. (2012). Structural insights into ligand binding and gene expression  
26 control by an adenosylcobalamin riboswitch. *Nat. Struct. Mol. Biol.* *19*, 1182–1184.
- 27 Piatkowski, P., Kasprzak, J.M., Kumar, D., Magnus, M., Chojnowski, G., and Bujnicki, J.M.  
28 (2016). RNA 3D structure modeling by combination of template-based method ModeRNA,  
29 template-free folding with SimRNA, and refinement with QRNAS. In *Methods in Molecular*  
30 *Biology*, pp. 217–235.
- 31 Popenda, M., Szachniuk, M., Antczak, M., Purzycka, K.J., Lukasiak, P., Bartol, N., Blazewicz,

- 1 J., and Adamiak, R.W. (2012). Automated 3D structure composition for large RNAs. *Nucleic*  
2 *Acids Res.* *40*.
- 3 Porter, E.B., Polaski, J.T., Morek, M.M., and Batey, R.T. (2017). Recurrent RNA motifs as  
4 scaffolds for genetically encodable small-molecule biosensors. *Nat. Chem. Biol.* *13*, 295–301.
- 5 Ren, A., and Patel, D.J. (2014). C-di-AMP binds the ydaO riboswitch in two pseudo-symmetry-  
6 related pockets. *Nat. Chem. Biol.* *10*, 780–786.
- 7 Ren, A., Xue, Y., Peselis, A., Serganov, A., Al-Hashimi, H.M., and Patel, D.J. (2015). Structural  
8 and Dynamic Basis for Low-Affinity, High-Selectivity Binding of L-Glutamine by the  
9 Glutamine Riboswitch. *Cell Rep.* *13*, 1800–1813.
- 10 Ren, A., Vušurovic, N., Gebetsberger, J., Gao, P., Juen, M., Kreutz, C., Micura, R., and Patel,  
11 D.J. (2016). Pistol ribozyme adopts a pseudoknot fold facilitating site-specific in-line cleavage.  
12 *Nat. Chem. Biol.* *12*, 702–708.
- 13 Richardson, J.S., Schneider, B., Murray, L.W., Kapral, G.J., Immormino, R.M., Headd, J.J.,  
14 Richardson, D.C., Ham, D., Hershkovits, E., Williams, L.D., et al. (2008). RNA backbone:  
15 Consensus all-angle conformers and modular string nomenclature (an RNA Ontology  
16 Consortium contribution). *RNA* *14*, 465–481.
- 17 Robertson, M.P., Igel, H., Baertsch, R., Haussler, D., Ares, M., and Scott, W.G. (2005). The  
18 structure of a rigorously conserved RNA element within the SARS virus genome. *PLoS Biol.* *3*,  
19 e5.
- 20 Safaee, N., Noronha, A.M., Rodionov, D., Kozlov, G., Wilds, C.J., Sheldrick, G.M., and  
21 Gehring, K. (2013). Structure of the parallel duplex of poly(A) RNA: Evaluation of a 50 year-old  
22 prediction. *Angew. Chemie - Int. Ed.* *52*, 10370–10373.
- 23 Sali, A. (1995). Comparative protein modeling by satisfaction of spatial restraints. *Mol. Med.*  
24 *Today* *1*, 270–277.
- 25 Schmitz, U., Behrens, S., Freymann, D.M., Keenan, R.J., Lukavsky, P., Walter, P., and James,  
26 T.L. (1999). Structure of the phylogenetically most conserved domain of SRP RNA. *RNA* *5*,  
27 1419–1429.
- 28 Schroeder, K.T., Daldrop, P., and Lilley, D.M.J. (2011). RNA tertiary interactions in a  
29 riboswitch stabilize the structure of a kink turn. *Structure*.
- 30 Seetharaman, M., Eldho, N. V., Padgett, R.A., and Dayie, K.T. (2006). Structure of a self-  
31 splicing group II intron catalytic effector domain 5: Parallels with spliceosomal U6 RNA. *RNA*

- 1 12, 235–247.
- 2 Simons, K.T., Kooperberg, C., Huang, E., and Baker, D. (1997). Assembly of protein tertiary  
3 structures from fragments with similar local sequences using simulated annealing and Bayesian  
4 scoring functions. *J. Mol. Biol.* 268, 209–225.
- 5 Sripakdeevong, P., Beauchamp, K., and Das, R. (2012). Why Can't We Predict RNA Structure  
6 At Atomic Resolution? In *RNA 3D Structure Analysis and Prediction*. Nucleic Acids and  
7 Molecular Biology, N.B. Leontis, and E. Westhof, eds. (Berlin, Heidelberg: Springer), pp. 43–  
8 65.
- 9 Sripakdeevong, P., Cevec, M., Chang, A.T., Erat, M.C., Ziegeler, M., Zhao, Q., Fox, G.E., Gao,  
10 X., Kennedy, S.D., Kierzek, R., et al. (2014). Structure determination of noncanonical RNA  
11 motifs guided by <sup>1</sup>H NMR chemical shifts. *Nat. Methods* 11, 413–416.
- 12 Suslov, N.B., Dasgupta, S., Huang, H., Fuller, J.R., Lilley, D.M.J., Rice, P.A., and Piccirilli, J.A.  
13 (2015). Crystal structure of the Varkud satellite ribozyme. *Nat. Chem. Biol.* 11, 840–846.
- 14 Szép, S., Wang, J., and Moore, P.B. (2003). The crystal structure of a 26-nucleotide RNA  
15 containing a hook-turn. *RNA* 9, 44–51.
- 16 Tan, D., Piana, S., Dirks, R.M., and Shaw, D.E. (2018). RNA force field with accuracy  
17 comparable to state-of-the-art protein force fields. *Proc. Natl. Acad. Sci. U. S. A.* 115, E1346–  
18 E1355.
- 19 Trausch, J.J., Xu, Z., Edwards, A.L., Reyes, F.E., Ross, P.E., Knight, R., and Batey, R.T. (2014).  
20 Structural basis for diversity in the SAM clan of riboswitches. *Proc. Natl. Acad. Sci. U. S. A.*  
21 111, 6624–6629.
- 22 Trausch, J.J., Marcano-Velázquez, J.G., Matyjasik, M.M., and Batey, R.T. (2015). Metal Ion-  
23 Mediated Nucleobase Recognition by the ZTP Riboswitch. *Chem. Biol.* 22, 829–837.
- 24 Wang, L., Liu, Y., Zhong, X., Liu, H., Lu, C., Li, C., and Zhang, H. (2019). DMFold: A novel  
25 method to predict RNA secondary structure with pseudoknots based on deep learning and  
26 improved base pair maximization principle. *Front. Genet.* 10, 143.
- 27 Warner, K.D., Chen, M.C., Song, W., Strack, R.L., Thorn, A., Jaffrey, S.R., and Ferré-D'Amaré,  
28 A.R. (2014). Structural basis for activity of highly efficient RNA mimics of green fluorescent  
29 protein. *Nat. Struct. Mol. Biol.* 21, 658–663.
- 30 Watkins, A.M., Geniesse, C., Kladwang, W., Zakrevsky, P., Jaeger, L., and Das, R. (2018).  
31 Blind prediction of noncanonical RNA structure at atomic accuracy. *Sci. Adv.* 4, eaar5316.

- 1   Watkins, A.M., Rangan, R., and Das, R. (2019). Chapter Nine - Using Rosetta for RNA
- 2   homology modeling. In *RNA Recognition*, A.E.B.T.-M. in E. Hargrove, ed. (Academic Press),
- 3   pp. 177–207.
- 4   Weinreb, C., Riesselman, A.J., Ingraham, J.B., Gross, T., Sander, C., and Marks, D.S. (2016).
- 5   3D RNA and Functional Interactions from Evolutionary Couplings. *Cell* *165*, 963–975.
- 6   Xiong, Y., and Sundaralingam, M. (2000). Two crystal forms of helix II of *Xenopus laevis* 5S
- 7   rRNA with a cytosine bulge. *RNA*.
- 8   Zhang, J., and Ferré-D’Amaré, A.R. (2013). Co-crystal structure of a T-box riboswitch stem i
- 9   domain in complex with its cognate tRNA. *Nature* *500*, 363–366.
- 10   Zhao, C., Xu, X., and Chen, S.J. (2017). Predicting RNA structure with vfold. In *Methods in*
- 11   *Molecular Biology*, pp. 3–15.
- 12   Zheng, L., Mairhofer, E., Teplova, M., Zhang, Y., Ma, J., Patel, D.J., Micura, R., and Ren, A.
- 13   (2017). Structure-based insights into self-cleavage by a four-way junctional twister-sister
- 14   ribozyme. *Nat. Commun.* *8*.
- 15
- 16

## 1 **Figure Titles and Legends**

2

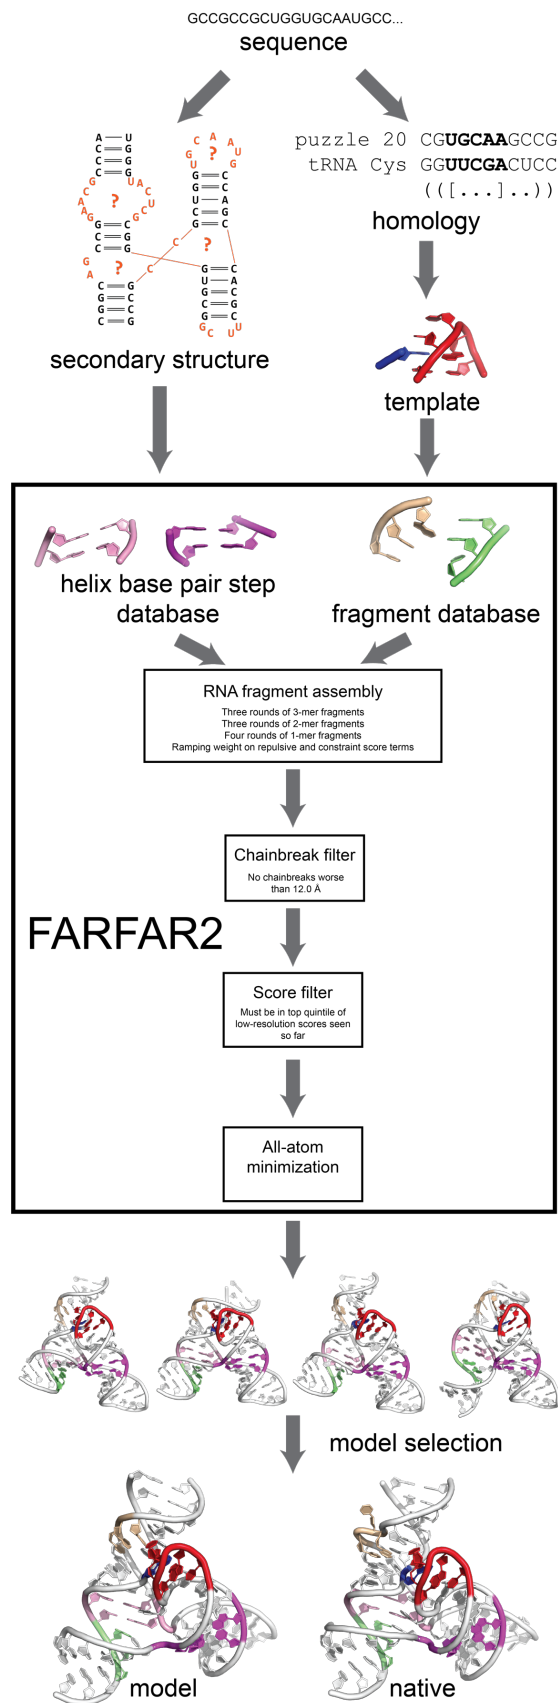

1 **Figure 1.** The FARFAR2 structure prediction algorithm. A 3D structure prediction problem is  
2 specified by RNA sequence; from that sequence, a consensus secondary structure may be  
3 obtained from prior literature studies or covariance analysis of sequence alignments (left), and  
4 homologies may be identified to previously solved structures (right). The orange areas in the  
5 depicted secondary structure diagram represent the regions whose conformations are unknown *a*  
6 *priori* and whose solution would guide the tertiary structure prediction. Manually identified  
7 homologies can also furnish template structures, which are combined by automatic sampling  
8 from a base pair step and fragment database in a low-resolution fragment assembly stage.  
9 Subsequent models are filtered to omit trajectories with bad chainbreaks or poor scores, and  
10 passing models are subjected to minimization in an all-atom scoring function. Finally, models  
11 are chosen from the resulting ensemble and compared to the native structure.



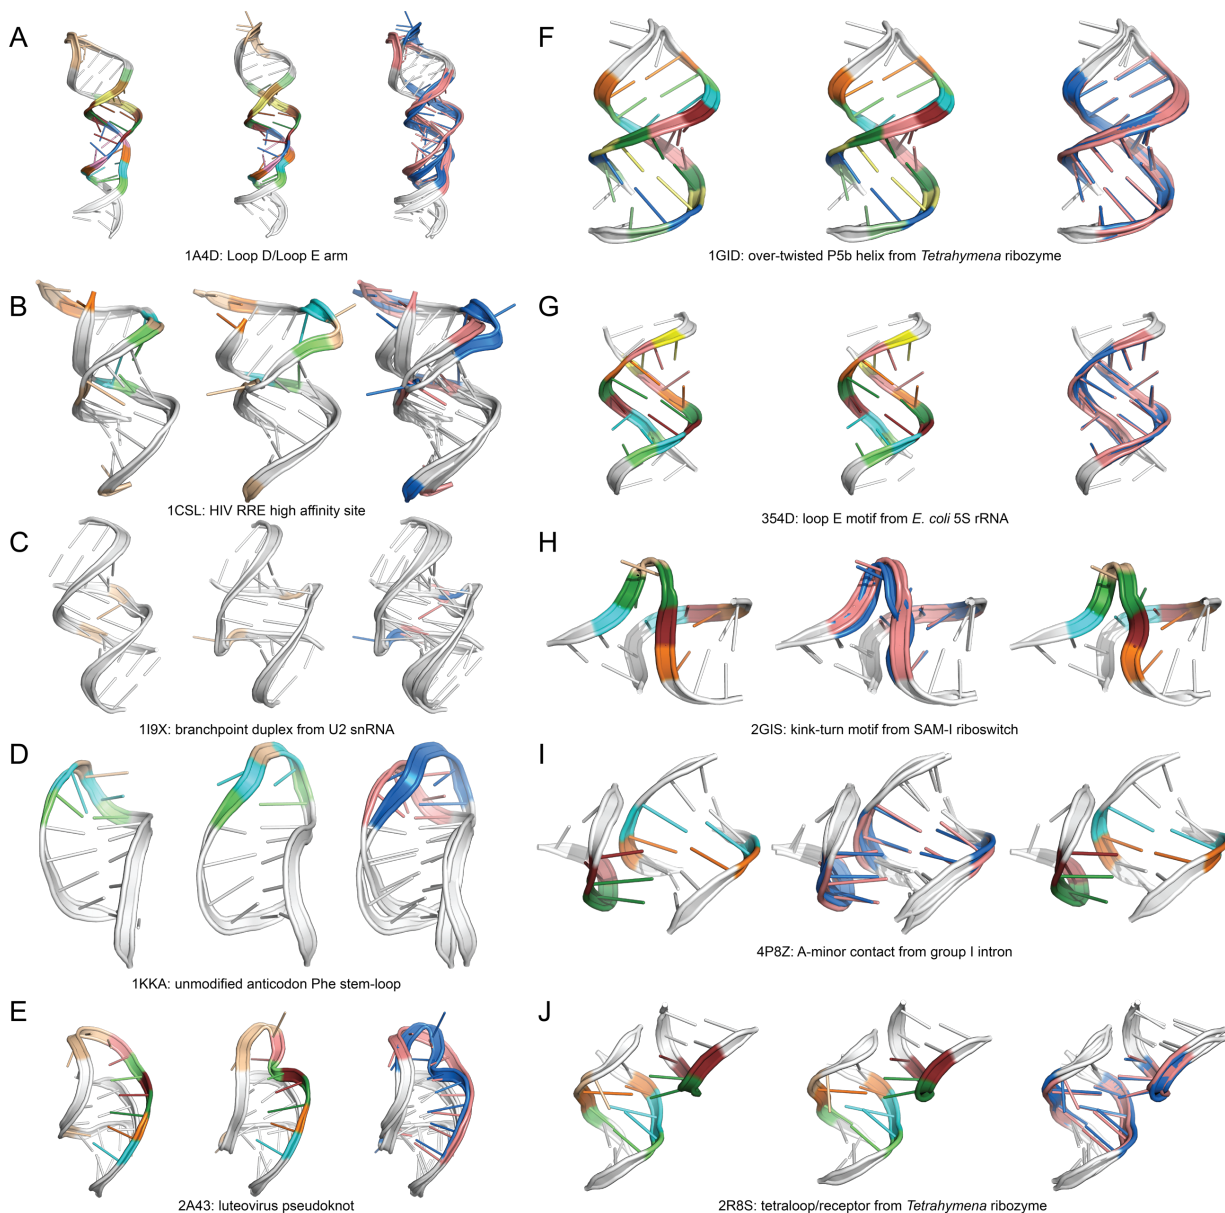

1  
2 **Figure 2.** Cases from the FARFAR2-Classics (A-E) and FARFAR2-Motifs (F-I) benchmarks  
3 that saw success from the application of FARFAR2 instead of FARNAs and SWM, respectively.  
4 In each panel, FARFAR2 model, native structure, and overlay are shown from left to right. In  
5 (A-E), the FARFAR2 model is the best of 5 low-energy cluster centers after clustering 5000  
6 models with a 3.0 Å radius; in (F-J), the FARFAR2 model is the best of 5 low-energy cluster  
7 centers after clustering 400 models with a 2.0 Å radius. In each case, model selection conditions  
8 exactly reproduce the conditions used in the original publications using these benchmarks where  
9 structures of this quality could not be recovered (Das and Baker, 2007; Watkins et al., 2018). In  
10 overlays, the FARFAR2 model is colored in salmon and the native in blue; in individual

- 1 structures, recovered noncanonical base pairs are colored in cyan, lime, orange, salmon, and
- 2 ruby, and recovered bulged residues are colored in wheat. In (A-E), residues from pre-specified,
- 3 flexible helices are colored white; in (F-J), fixed input residues (mostly helical) are colored
- 4 white.
- 5

1

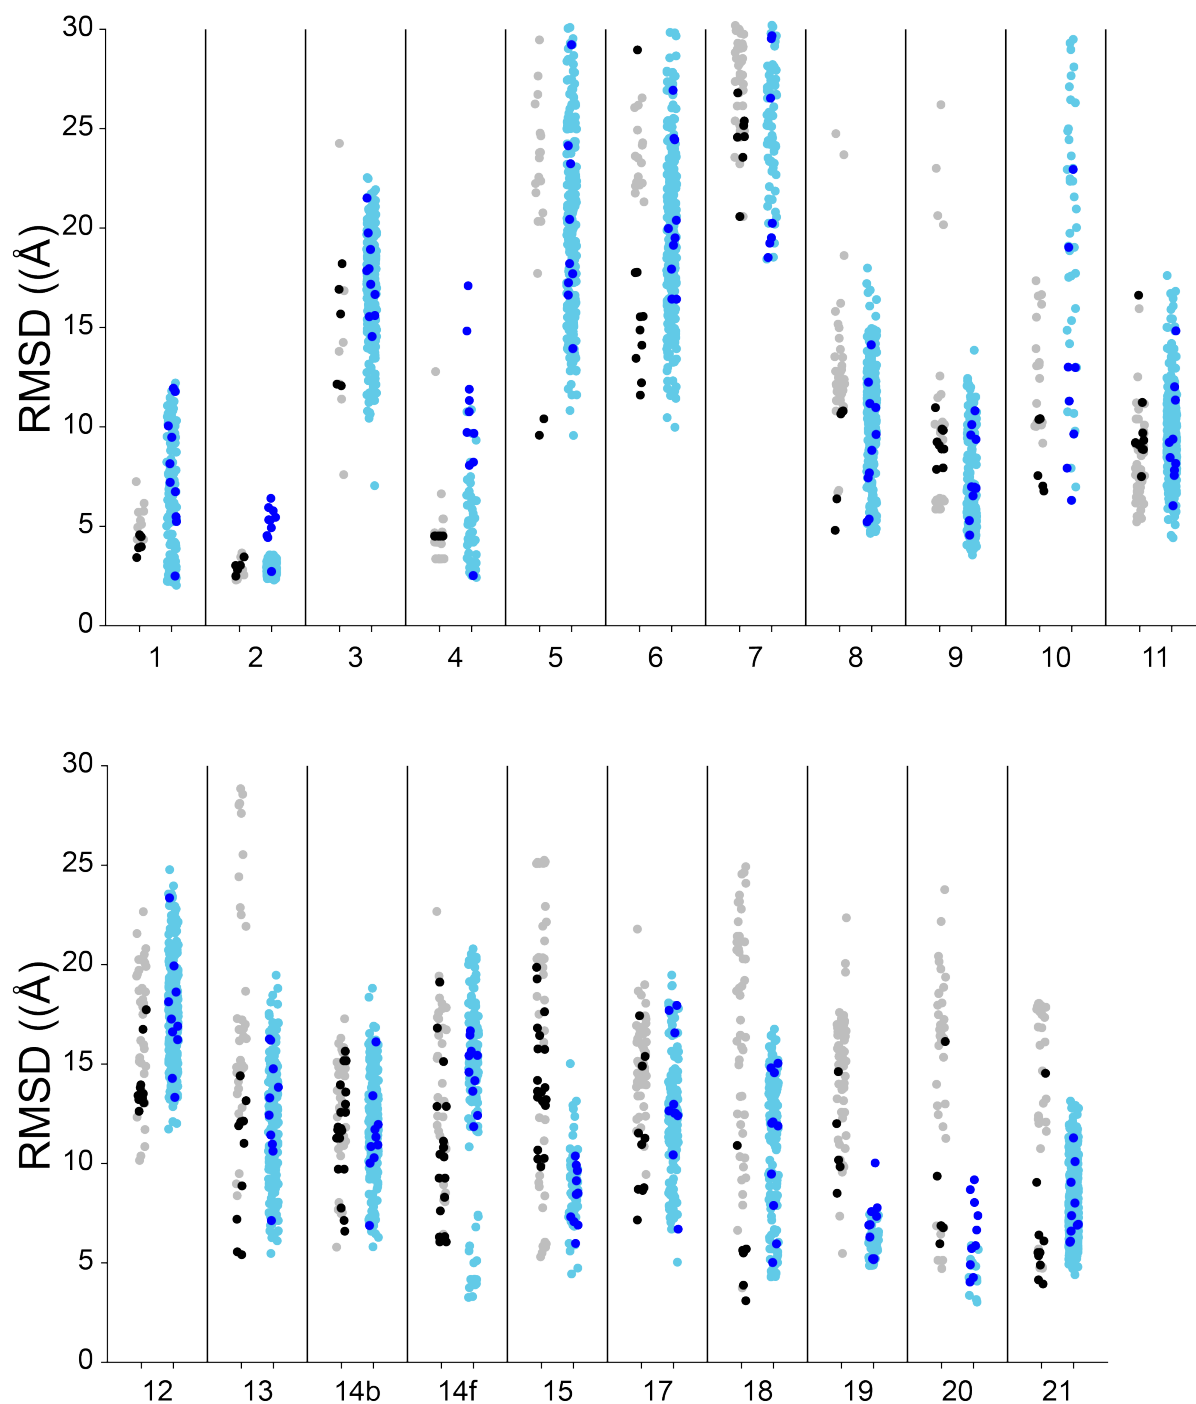

2

3 **Figure 3.** Direct comparison between original RNA-Puzzles submissions from all groups (left  
4 points) and FARFAR2 models (right points) for each benchmark case. Among RNA-puzzles

- 1 submissions, those from the Das lab (created using manually curated Rosetta models, mostly
- 2 using FARFAR) are black points; others gray. Among FARFAR2 models, light blue points are
- 3 the top 1% of models by energy; dark blue are cluster centers.
- 4

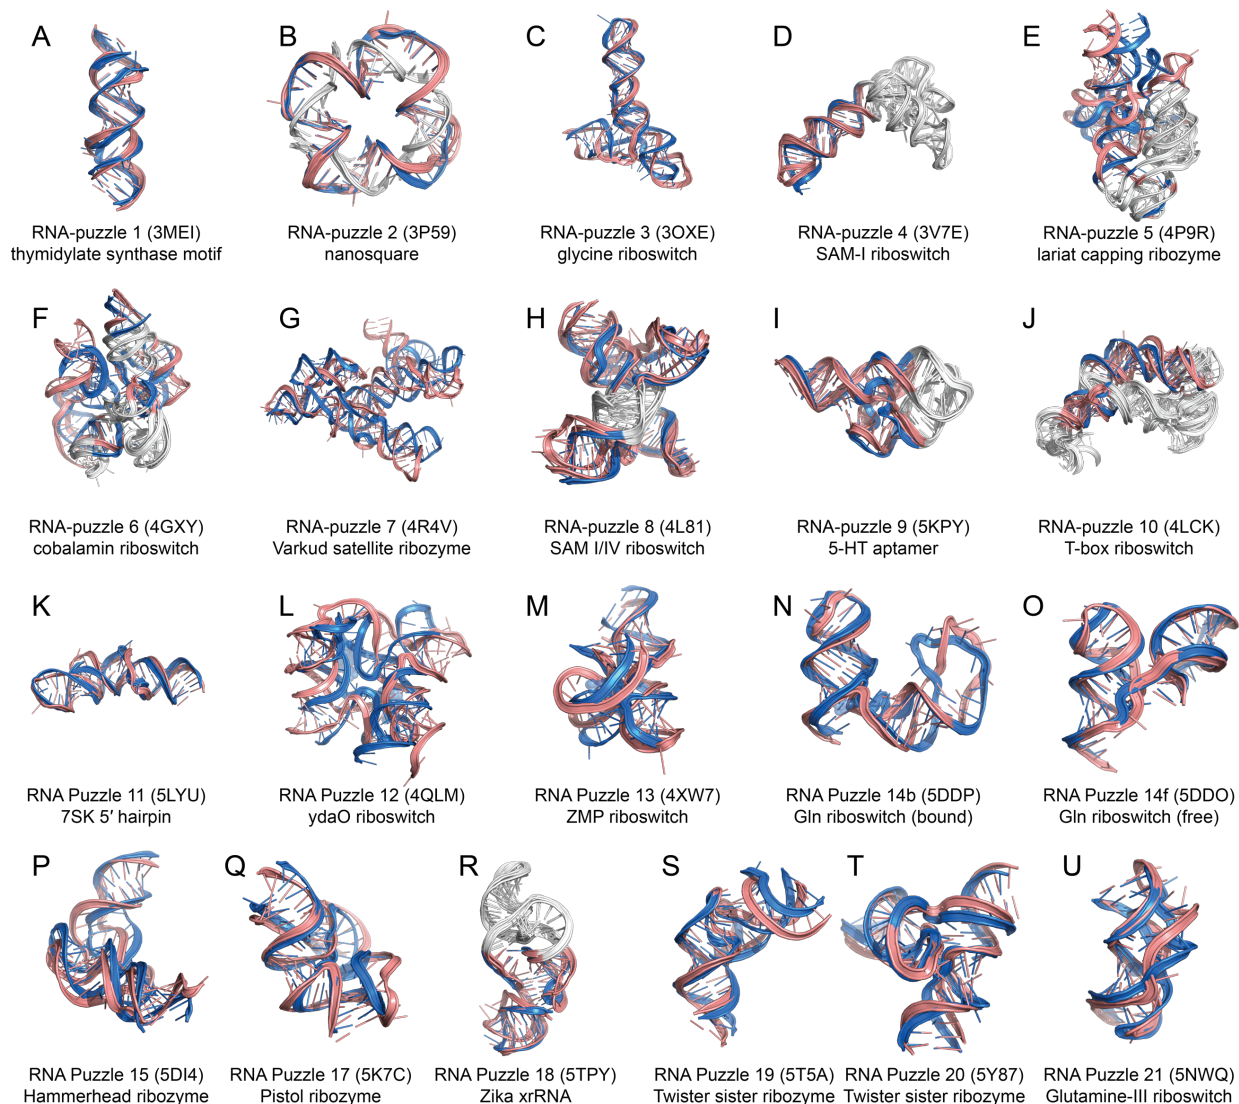

1  
2 **Figure 4.** The best-of-top-1% RMSD prediction (pink) vs. native (blue) for each RNA-Puzzle in  
3 the FARFAR2-Puzzles benchmark. White regions are input template structures employed at the  
4 original time of modeling and employed in the FARFAR2 simulation.

5

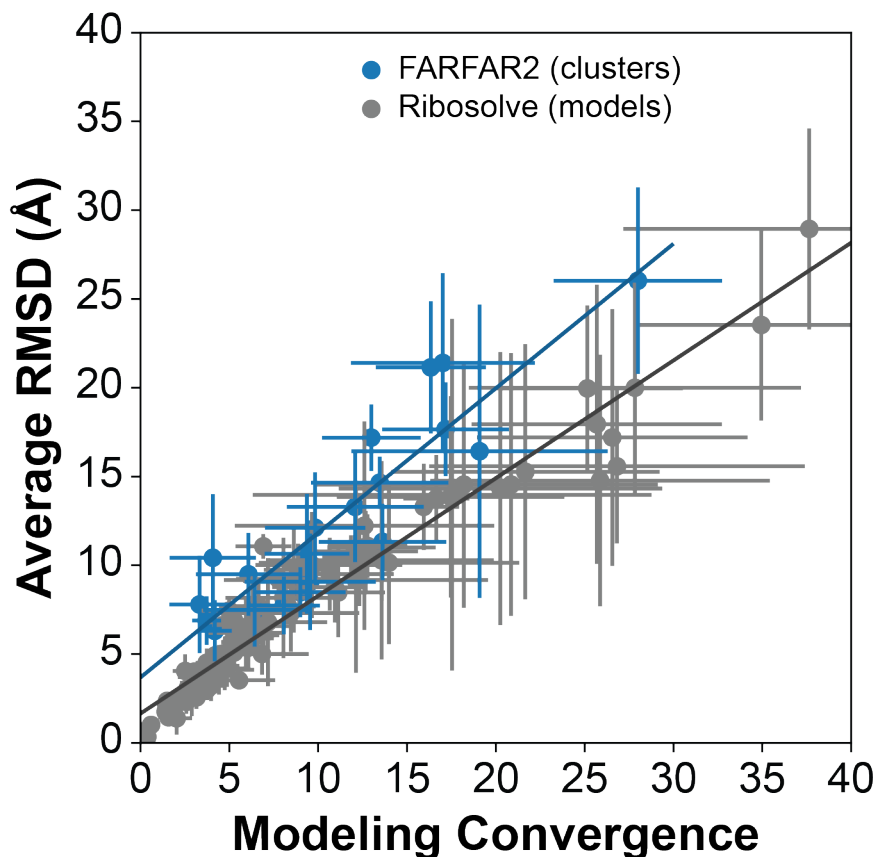

1  
2 **Figure 5.** Convergence (the average pairwise RMSD among the top 10 models) is predictive of  
3 modeling accuracy (the average RMSD to native of the 10 lowest energy models or clusters)  
4 whether with electron density (DRRAFTER and Ribosolve models, gray) or without  
5 (FARFAR2, blue). Lines of best fit: Ribosolve  $y = 0.66 x + 1.65 \text{ \AA}$  ( $R^2 = 0.94$ ); FARFAR2  $y =$   
6  $0.81 x + 3.69 \text{ \AA}$  ( $R^2 = 0.84$ ). Error bars represent standard deviation of pairwise RMSD (x-error)  
7 and standard deviation of RMSD to native (y-error), which are themselves related as Ribosolve  
8  $y\text{-error} = 0.76 x\text{-error} + 0.10 \text{ \AA}$  ( $R^2 = 0.90$ ); FARFAR2  $y\text{-error} = 0.91 x\text{-error} + 0.09 \text{ \AA}$  ( $R^2 =$   
9  $0.64$ ).

A

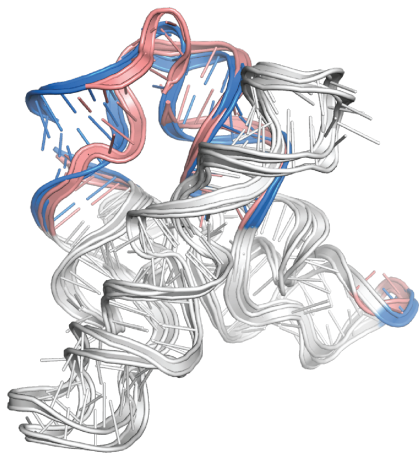

F. nucleatum tandem glycine riboswitch

B

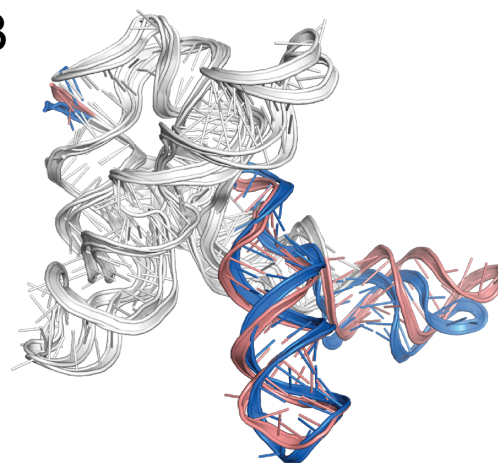

V. cholerae tandem glycine riboswitch

C

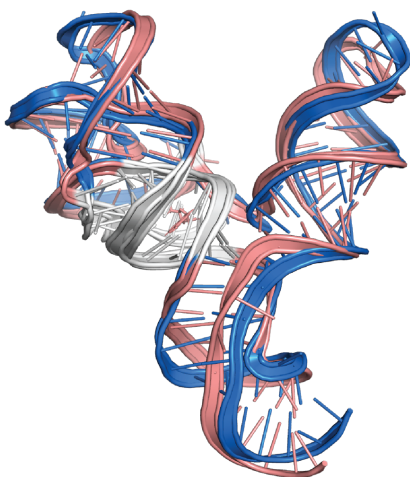

SAM-IV riboswitch

D

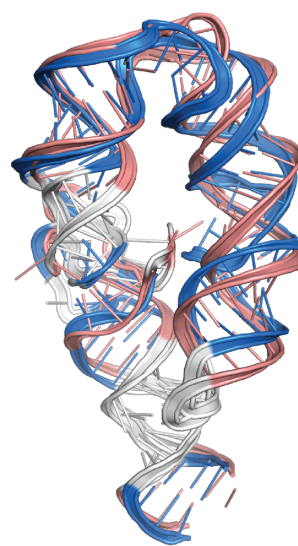

Spinach-TTR-3

E

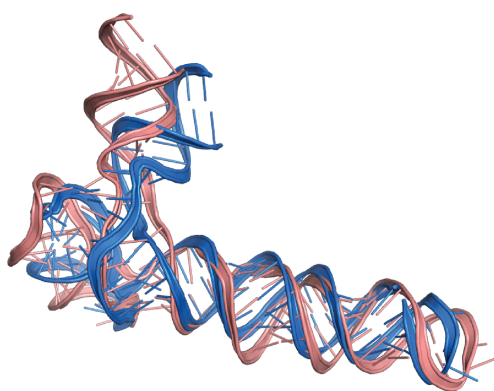

VA RNA I

- 1 **Figure 6.** Blind predictions (salmon) of five complex RNA folds (blue) subsequently determined
- 2 via cryo-electron microscopy: the (A) *F. nucleatum* and (B) *V. cholerae* full-length tandem
- 3 glycine riboswitches, as well as the (C) SAM-IV riboswitch, the (D) Spinach-TTR-3, and the (E)
- 4 adenoviral VA RNA I. Predictions generally achieve nucleotide accuracy. White regions are
- 5 input template structures.



## 1 **Tables with Titles and Legends**

2

1 **Table 1.** Results for each RNA-Puzzle challenge revisited in this work.

| Puzzle | PDB  | Length<br>(Total) <sup>‡</sup> | Number of Structures<br>Generated | RNA                        | FARFAR2                             |                                                   |                                                           |                                                           |
|--------|------|--------------------------------|-----------------------------------|----------------------------|-------------------------------------|---------------------------------------------------|-----------------------------------------------------------|-----------------------------------------------------------|
|        |      |                                |                                   |                            | Top 1%<br>Best<br>RMSD <sup>†</sup> | Best of 10 Low-<br>E Cluster<br>RMSD <sup>†</sup> | Best RNA-puzzle<br>RMSD (All<br>Submissions) <sup>†</sup> | Best RNA-puzzle<br>RMSD (Das<br>Submissions) <sup>†</sup> |
| 1      | 3mei | 46 (46)                        | 14052                             | thymidylate synthase motif | 2.03                                | 2.50                                              | 3.40                                                      | 3.40                                                      |
| 2      | 3p59 | 60 (100)                       | 43431                             | nanosquare                 | 2.28                                | 2.71                                              | 2.30                                                      | 2.45                                                      |
| 3      | 3oxe | 84 (84)                        | 33442                             | glycine riboswitch         | 7.05                                | 12.41                                             | 7.60                                                      | 12.10                                                     |
| 4      | 3v7e | 40 (126)                       | 5768                              | SAM-I riboswitch           | 2.43                                | 2.52                                              | 3.40                                                      | 4.50                                                      |
| 5      | 4p9r | 130 (188)                      | 24903                             | lariat capping ribozyme    | 9.57                                | 13.94                                             | 9.58                                                      | 9.58                                                      |
| 6      | 4gxy | 98 (158)                       | 28859                             | cobalamin riboswitch       | 9.98                                | 13.08                                             | 12.28                                                     | 12.28                                                     |
| 7      | 4r4v | 185 (185)                      | 7963                              | VS ribozyme                | 15.21                               | 18.52                                             | 20.72                                                     | 20.72                                                     |
| 8      | 4l81 | 71 (96)                        | 33086                             | SAM I/IV                   | 4.65                                | 5.23                                              | 4.80                                                      | 4.80                                                      |
| 9      | 5kpy | 40 (71)                        | 18660                             | 5-HT aptamer               | 4.54                                | 4.56                                              | 5.86                                                      | 7.87                                                      |
| 10     | 4lck | 83 (177)                       | 5873                              | T-box riboswitch           | 6.31                                | 6.31                                              | 6.78                                                      | 6.78                                                      |
| 11     | 5lyu | 57 (57)                        | 41952                             | 7SK 5' hairpin             | 4.43                                | 6.04                                              | 5.22                                                      | 7.50                                                      |
| 12     | 4qlm | 117 (117)                      | 35506                             | ydaO riboswitch            | 11.73                               | 13.32                                             | 10.15                                                     | 12.63                                                     |
| 13     | 4xw7 | 60 (60)                        | 20297                             | ZMP riboswitch             | 5.47                                | 7.13                                              | 5.41                                                      | 5.41                                                      |
| 14b    | 5ddp | 61 (61)                        | 24531                             | Gln riboswitch (bound)     | 5.81                                | 6.88                                              | 5.79                                                      | 6.59                                                      |
| 14f    | 5ddo | 61 (61)                        | 15112                             | Gln riboswitch (free)      | 3.26                                | 11.85                                             | 6.05                                                      | 6.05                                                      |
| 15*    | 5di4 | 68 (68)                        | 6123                              | Hammerhead ribozyme        | 4.44                                | 5.98                                              | 5.30                                                      | 9.83                                                      |
| 17     | 5k7c | 58 (58)                        | 16529                             | Pistol ribozyme            | 5.03                                | 6.69                                              | 7.13                                                      | 7.13                                                      |
| 18     | 5tpy | 34 (71)                        | 17091                             | Zika xrRNA                 | 4.29                                | 5.02                                              | 3.15                                                      | 3.15                                                      |
| 19     | 5t5a | 56 (62)                        | 4499                              | Twister sister ribozyme    | 4.86                                | 5.16                                              | 5.50                                                      | 10.20                                                     |
| 20     | 5y87 | 62 (68)                        | 1547                              | Twister sister ribozyme    | 3.03                                | 4.03                                              | 6.80                                                      | 6.80                                                      |
| 21     | 5nwq | 41 (41)                        | 48146                             | Guanidinium-III riboswitch | 4.40                                | 6.04                                              | 3.93                                                      | 3.93                                                      |

2 \*The native structure in 15 was corrupted by a crystal contact that caused a strand-swapped pairing intractable to prediction. We  
3 reconstructed the strand-unswapped monomer and rescored original submissions to present a more realistic modeling challenge.

4 <sup>†</sup>Heavyatom RMSD is calculated over all residues, following superposition over all residues.

5 <sup>‡</sup>Length is number of residues remodeled (not found in input templates); total counts template residues.

1 **Table 2.** Results for each blind challenge modeled in this work.

| Challenge | PDB     | Length<br>(Total) | Number of Structures<br>Generated | RNA                                | Top 1%<br>Best RMSD | Best Pre-Registered<br>Model* |
|-----------|---------|-------------------|-----------------------------------|------------------------------------|---------------------|-------------------------------|
| 1         | pending | 45 (167)          | 2681                              | F. nucleatum glycine<br>riboswitch | 2.84                | 2.99                          |
| 2         | pending | 145 (229)         | 3949                              | V. cholerae glycine<br>riboswitch  | 4.42                | 4.31                          |
| 3         | pending | 96 (119)          | 10833                             | SAM-IV riboswitch                  | 3.82                | 3.19                          |
| 4         | pending | 97 (130)          | 3336                              | Spinach-TTR-3                      | 6.58                | 6.66                          |
| 5         | 6ol3    | 112 (112)         | 87170                             | VA RNA I                           | 4.82                | 7.66                          |

2 \*Only five models were selected for the SAM-IV riboswitch blind challenge; ten for the others.

3

## 1 **STAR Methods**

2

### 3 **CONTACT FOR REAGENT AND RESOURCE SHARING**

4 Further information and requests for resources and reagents should be directed to and will be  
5 fulfilled by the Lead Contact, Rhiju Das ([rhiju@stanford.edu](mailto:rhiju@stanford.edu)).

6

### 7 **METHOD DETAILS**

8 All Rosetta commands were run using Rosetta weekly release 2019.22, available for free  
9 download for noncommercial use at <http://www.rosettacommons.org>.

10

#### 11 **An automated fragment assembly benchmark**

12 Two technical improvements within Rosetta permitted rapid progress on a fully automated  
13 fragment assembly protocol. First, FARFAR2 jobs may be fully specified and run using a single  
14 command line, rather than requiring pre-configuration using a ‘params file’ with a complex  
15 language (Das and Baker, 2007); example command-lines are given below (‘FARFAR2  
16 execution on benchmark cases’). Second, we developed a benchmarking framework (Watkins et  
17 al., 2018), available at [https://github.com/daslab/rna\\_benchmark](https://github.com/daslab/rna_benchmark) with documentation and  
18 instructions.

19

#### 20 **New fragment set**

21 We obtained release 3.10 of representative nonredundant 3D structures from BGSU’s RNA 3D  
22 Hub (Leontis and Zirbel, 2012). We obtained the indicated PDB chains and parsed them into  
23 fragment and jump (base-base rigid body transformations for base pairs) database files using the  
24 following command lines:

25

```
26 rna_database -s *_RNA.pdb -vall_torsions  
27 RICHARDSON_RNA18_2.5_revised.torsions -cut_at_rna_chainbreak true  
28 -ignore_zero_occupancy false -guarantee_no_DNA true
```

29

```
30 rna_database -s *_RNA.pdb -jump_database true -cut_at_rna_chainbreak true  
31 -ignore_zero_occupancy false -guarantee_no_DNA true -out:file:o  
32 RICHARDSON_RNA18_2.5_revised.jump
```

1

## 2 **Fragment homology exclusion**

3 Benchmarks of fragment assembly approaches can give misleading overestimates of accuracy if  
4 fragments of the experimental ('native') structure are included during modeling. In order to  
5 better mimic blind prediction scenarios in which the experimental structure is not available at the  
6 time of modeling, we ensured that our fragment libraries were free of contamination from the  
7 native structures employed in the benchmarks through a "fragment homology exclusion" option  
8 implemented in FARFAR and controlled by command-line options; see also (Watkins et al.,  
9 2018). In this mode, all six-nucleotide contiguous stretches of RNA to be built are extracted from  
10 the experimental structure, and any fragments in the fragment library that are deemed too similar  
11 to the experimental structure are excluded as possible contamination from that experimental  
12 structure or a close homolog. More specifically, these ranges of structure are compared by  
13 heavy-atom RMSD to every fragment in the fragment library with matching purine/pyrimidine  
14 content, and fragments with RMSD less than 1.2 Å from the experimental structure are  
15 eliminated from consideration.

16

## 17 **Modes of applying secondary structure information**

18 In most modeling cases we have encountered, models of secondary structure were previously  
19 available based on expert analysis, thermodynamic modeling packages (Hofacker and Lorenz,  
20 2014; Mathews, 2006), and/or sequence alignment information. Such known secondary structure  
21 (see Supplemental Table 4) can now be specified either via command-line or in an input text file.  
22 The FARFAR2 protocol can apply this secondary structure information in four ways. First, to  
23 replicate the original FARNA style of simulation, one may specify no secondary structure at all.  
24 Second, a specified secondary structure can provide energetic "base pair constraints" (see  
25 **FARFAR2 execution on benchmark cases** below) that tend to draw paired residues together,  
26 first introduced in (Das et al., 2010). Base pair constraints consist of harmonic restraints placed  
27 on the distance between corresponding Watson-Crick edge atoms (1.9 Å with a standard  
28 deviation of 0.1 Å) as well as a harmonic restraint placed on the distance between sugar C1  
29 atoms (10.5 Å with a standard deviation of 1 Å) to favor paired, rather than stacked-and-tilted,  
30 conformations. The influence of these constraints are, by default, ramped up over each round of  
31 low-resolution modeling, then applied at full strength during minimization. Third, helical stems

1 may be generated and then provided as fixed inputs to the simulation (either individual helices or  
2 ensembles thereof), as described in (Cheng et al., 2015; Miao et al., 2015). This procedure is  
3 automated by the `rna_benchmark` system but may be carried out manually using scripts from  
4 the Rosetta tools directory (see **Setting up helices** below). Fourth, helix flexibility may be  
5 simulated directly in a kinematically realistic way by sampling from a library of “base pair  
6 steps”. Base pair step moves keep the base paired secondary structure fixed while sampling  
7 orientation changes between consecutive base pairs seen in the crystallographic database;  
8 Rosetta’s implementation is generalized to permit realistic sampling of stems with interrupting  
9 nucleotide bulges on one side, as well. This mode had not been previously described or tested but  
10 is now the default mode, due to its superior performance in the benchmarking described in the  
11 main text and supplement. Detailed comparison of the effects of base pair step sampling on  
12 Puzzle 21, a guanidinium riboswitch, is shown in Figure S4; a comparison of its performance  
13 versus fixed helices across multiple large puzzles is depicted in Figure S5.

14

## 15 **Benchmark cases**

16 The three benchmarks evaluated were intended to evaluate the performance of the new  
17 FARFAR2 ‘best practices’ on challenges of qualitatively different scales. The original FARNA  
18 benchmark and the stepwise Monte Carlo benchmark examined relatively small structures,  
19 though many representative examples in the latter case were fairly complex. In contrast, the  
20 RNA-Puzzles benchmark, like the five blind challenges undertaken to test this method, examined  
21 entire folded RNAs, typically with many tertiary contacts.

22

23 The FARFAR2-Classics benchmark comprised 18 challenges, each of which was either a single-  
24 stranded stem-loop or a duplex. Two structures that overlapped exactly with the FARFAR2-  
25 Motifs benchmark (see below) were omitted from the set of 20 structures (1J6S, a G-quadruplex;  
26 1ZIH, a GCAA tetraloop) used to benchmark the original FARNA algorithm (Das and Baker,  
27 2007). In each case, the challenge structure was the entire crystallized RNA. As the central  
28 benchmark challenges, these were approached in four distinct modes of secondary structure  
29 specification: none, “base pair constraint” generation, fixed helical “chunks,” and “base pair  
30 step” sampling. Either the default fragment library or a newly generated fragment library were  
31 used to sample loop nucleotides and, if applicable, base pair steps. Finally, results for each

1 challenge were either left un-minimized or optimized in one of two scoring functions: the  
2 original FARFAR refinement scoring function (hereafter “hires”) or the modern RNA scoring  
3 function developed for stepwise Monte Carlo (originally termed *rna\_res\_level\_energy4.wts*,  
4 hereafter called “res4”) (Watkins et al., 2018). (The same low-resolution structures were  
5 minimized to produce the final data set.) As in the original FARFAR paper, 50,000 structures  
6 were generated for each simulation. Additionally, as a control, we replicated the exact  
7 parameters of the original FARFAR work, including an eleven-year-old fragment library based  
8 only on the *H. marismortui* 23S ribosome (PDB: 1JJ2). This replication performed better on the  
9 majority of cases, suggesting some level of Rosetta simulation improvement and bug fixes since  
10 2007 (see Figure S1, Table S1). For this comparison, we had to reduce the fragment homology  
11 exclusion radius from 1.2 Å to 0.5 Å or else we were unable to discover fragments for cases  
12 1CSL, 1DQF, 1ESY, 1I9X, 1KD5, 1Q9A, 1QWA, 1XJR, 2A43, or 2F88. Informed by a  
13 comparison of these simulation conditions, we decided to take the SWM “res4” scoring function  
14 and the new fragment libraries as the FARFAR2 standard. We also chose to specify secondary  
15 structure through base pair steps. Though the advantage over fixed helical stems was not obvious  
16 across the FARFAR benchmark, and we anticipated that more complex tertiary environments,  
17 such as those found in typical whole structure prediction cases, would benefit further from some  
18 form of helix flexibility, and this was later confirmed (see main text; and Figures S4-S5). These  
19 optimal FARFAR2 parameters also proved robust to variations in other simulation settings. We  
20 repeated the whole benchmark set with the final FARFAR2 settings but disabled all low-  
21 resolution filters (which restart simulations that have generated structures with chainbreaks,  
22 missing base pairs, or bad scores). We also tested reducing the ten-round fragment assembly  
23 schedule to only one or two rounds, and we still obtained excellent results (Supplemental Figure  
24 S1D). None of these configuration variants ought to be taken as new best practices as their own,  
25 however, particularly for larger RNA folds. Setting up only one simulation round, for example,  
26 increases the computational expense more than fourfold on average, and while score, base pair,  
27 and chainbreak filters may not be very important for simple folds that are quick to energy-  
28 minimize, they prevent considerable needless computation on large RNAs.

29  
30 The FARFAR2-Motifs benchmark set was chosen because it was a direct expansion of the earlier  
31 FARFAR benchmark (Das et al., 2010), augmented with challenges that demonstrated new

1 features of FARFAR2 (such as ‘aligned’ cases, which permit expert specification of the relative  
2 orientation of a subset of the native structure; and support for chemically modified nucleotides).  
3 This expansion had originated when developing the stepwise Monte Carlo (SWM) algorithm and  
4 included single-stranded loops, two-way and multi-way junctions, tertiary contacts, and motifs  
5 that exist outside of a Watson-Crick context (such as quadruplexes (Pan et al., 2006) and parallel  
6 strands (Safaei et al., 2013)). We found that SWM frequently produced excellent native RMSDs.  
7 We generated 10,000 structures for each benchmark case: fewer than for FARFAR2-Classics  
8 because most of the above structures were smaller and structurally simpler, and because there are  
9 more than four times as many benchmark cases. Though SWM delivers performance  
10 unattainable by fragment methods, strong performance on this benchmark set would suggest the  
11 ability of fragment assembly methods to provide good starting points for higher-resolution  
12 simulation at a fraction of the computational cost required.

13  
14 The FARFAR2-Puzzles benchmark set includes all RNA-Puzzles for which solutions and  
15 submissions were available at the time of this study: that is, all of the first 21 except for 16, and  
16 including both bound and unbound states of 14. In some cases, a large proportion of the problem  
17 was known approximately by homology, while in others only the helices alone were an  
18 appropriate starting point. Each problem was run to generate several thousand structures, aiming  
19 for substantial sampling at modest computational expense. (Since typical RNA-Puzzle rounds  
20 allow three to four weeks of prediction, this is a fraction of the total sampling available for a  
21 typical challenge.)

22  
23 **FARFAR2 execution on benchmark cases**  
24 We tested multiple combinations of settings for the FARFAR2 protocol. We present here the  
25 relevant command lines for each possible configuration, as operated on the 157D challenge from  
26 the FARNA benchmark. (The command line argument to run with a particular set of conditions,  
27 such as secondary structure specification vs. number of rounds, are mutually independent of each  
28 other and can be recombined at will.)

29  
30 *New recommended defaults*



1 Before delving into the details of benchmark conditions, here is an example of how one might  
2 specify a modeling problem using the new FARFAR2 defaults. Suppose one is concerned with  
3 the guanidinium-III riboswitch. First, prepare a FASTA-formatted file `guanidine_III.fasta`:

```
4  
5 >guanidine_III A:1-41  
6 ccggacgaggugcgccguaccggucaggacaagacggcgc
```

7  
8 Then, prepare a file containing the dot-bracket notation secondary structure,  
9 `guanidine_III.secstruct`. Since only the first line of the secondary structure file is read, one  
10 may include the sequence as the second line as a useful point of reference.

```
11  
12 [[[[[.....(((((((...]]]].....)))))  
13 ccggacgaggugcgccguaccggucaggacaagacggcgc
```

14  
15 Finally, execute the following command:

```
16 rna_denovo -fasta guanidine_III.fasta -secstruct_file guanidine_III.fasta  
17 -minimize_rna true
```

18  
19 One may provide a parameter `-nstruct` to control how many structures are generated by each  
20 execution of the above command; the parameter `-out:file:silent` names the output file where  
21 results are accumulated.

22  
23 *FARNA replication*

24 An exact replication of the original FARNA benchmark required a special flag to use the original  
25 fragment library using only a single ribosome crystal structure (PDB 1JJ2). The specification of  
26 a single base pair (as found in `157d_orig_START1_157d.pdb`) is the minimum necessary  
27 information to seed simulation of a bimolecular RNA.

```
28 rna_denovo -fasta 157d_orig.fasta -native 157d_orig_NATIVE_157d.pdb  
29 -s 157d_orig_START1_157d.pdb -minimize_rna false -cycles 20000 -nstruct 20  
30 -use_1jj2_torsions true
```

31  
32 *No secondary structure specification, no minimization, old fragments*

1 This run replicates the FARNA benchmark conditions but uses the fragment set that was in  
2 regular use by 2010.

```
3 rna_denovo -fasta 157d_orig.fasta -native 157d_orig_NATIVE_157d.pdb  
4 -s 157d_orig_START1_157d.pdb -minimize_rna false -cycles 20000 -nstruct 20  
5 -fragment_homology_rmsd 1.2 -exclusion_match_type MATCH_YR  
6 -jump_library_file 1jj2_RNA_jump_library.dat  
7 -vall_torsions RICHARDSON_RNA09.torsions -bps_moves false
```

8

9 *No secondary structure specification, no minimization, new fragments*

10 This run uses a new set of fragments generated for this work.

```
11 rna_denovo -fasta 157d_orig.fasta -native 157d_orig_NATIVE_157d.pdb  
12 -s 157d_orig_START1_157d.pdb -minimize_rna false -cycles 20000 -nstruct 20  
13 -fragment_homology_rmsd 1.2 -exclusion_match_type MATCH_YR -bps_moves false
```

14

15 *No secondary structure specification, minimization under 'rna\_hires.wts', new fragments*

16 This run uses the new set of fragments generated for this work.

```
17 rna_denovo -fasta 157d_orig.fasta -native 157d_orig_NATIVE_157d.pdb  
18 -s 157d_orig_START1_157d.pdb -minimize_rna true -cycles 20000 -nstruct 20  
19 -fragment_homology_rmsd 1.2 -exclusion_match_type MATCH_YR  
20 -score:weights rna/denovo/rna_hires.wts -bps_moves false
```

21

22 *No secondary structure specification, minimization under 'rna\_res\_level\_energy4.wts', new  
23 fragments*

24 This run uses a new set of fragments generated for this work.

```
25 rna_denovo -fasta 157d_orig.fasta -native 157d_orig_NATIVE_157d.pdb  
26 -s 157d_orig_START1_157d.pdb -minimize_rna true -cycles 20000 -nstruct 20  
27 -fragment_homology_rmsd 1.2 -exclusion_match_type MATCH_YR -bps_moves false
```

28

29 *Base pair constraints, minimization under 'rna\_res\_level\_energy4.wts', new fragments*

30 This run specifies a secondary structure to generate base pair constraints; it does not require a  
31 starting PDB.

```
32 rna_denovo -fasta 157d_orig.fasta -native 157d_orig_NATIVE_157d.pdb  
33 -secstruct "(((.((((.((((,)))))).)))" -minimize_rna true -cycles 20000
```

```
1 -nstruct 20 -fragment_homology_rmsd 1.2 -exclusion_match_type MATCH_YR -  
2 bps_moves false
```

3

4 *Base pair steps, minimization under 'rna\_res\_level\_energy4.wts', new fragments*

5 This run specifies a secondary structure to sample base pair steps; it does not require a starting  
6 PDB.

```
7 rna_denovo -fasta 157d_orig.fasta -native 157d_orig_NATIVE_157d.pdb  
8 -secstruct "(((.((((.((((,)))..)))))))" -minimize_rna true -cycles 20000  
9 -nstruct 20 -fragment_homology_rmsd 1.2 -exclusion_match_type MATCH_YR
```

10

11 *Fixed helical inputs, minimization under 'rna\_res\_level\_energy4.wts', new fragments*

12 This run uses multiple fixed input stems.

```
13 rna_denovo -fasta 157d_orig.fasta -native 157d_orig_NATIVE_157d.pdb  
14 -s 157d_chunks_HELIX1_157d.pdb 157d_chunks_HELIX2_157d.pdb  
15 157d_chunks_HELIX3_157d.pdb -minimize_rna true -cycles 20000 -nstruct 20  
16 -fragment_homology_rmsd 1.2 -exclusion_match_type MATCH_YR -bps_moves false
```

17

18 *Base pair steps, minimization under 'rna\_res\_level\_energy4.wts', new fragments, no filters*

19 This run turns off filters (for score and chain closure) used during the low resolution phase to  
20 improve the quality of output structures at the cost of additional run time.

```
21 rna_denovo -fasta 157d_orig.fasta -native 157d_orig_NATIVE_157d.pdb  
22 -secstruct "(((.((((.((((,)))..)))))))" -minimize_rna true -cycles 20000  
23 -nstruct 20 -fragment_homology_rmsd 1.2 -exclusion_match_type MATCH_YR  
24 -no_filters
```

25

26 *Base pair steps, minimization under 'rna\_res\_level\_energy4.wts', new fragments, one round of  
27 fragment assembly*

28 Typical runs of fragment assembly go through ten rounds: three rounds of 3-mer fragment  
29 insertion, three of 2-mers, and four of 1-mers, while ramping the weights of particular score  
30 terms. Setting the number of total rounds to one or two makes the protocol much more abrupt in  
31 its transitions but does not affect other simulation settings.

```
32 rna_denovo -fasta 157d_orig.fasta -native 157d_orig_NATIVE_157d.pdb  
33 -secstruct "(((.((((.((((,)))..)))))))" -minimize_rna true -cycles 20000
```

```
1 -nstruct 20 -fragment_homology_rmsd 1.2 -exclusion_match_type MATCH_YR
2 -rounds 1
```

3

#### 4 **Setting up helices**

5 To use fixed helical inputs for a FARFAR structure prediction challenge without using the  
6 rna\_benchmark setup scripts, a Python script is available within Rosetta tools:

```
7 rna_helix.py -seq ggg ccc
```

8

9 will create a three base pair helix of sequence GGGCCC, numbered 1-6 with no chain letter. To  
10 impose some reasonable numbering:

```
11 renumber_pdb_in_place.py helix.pdb A:1-3 B:1-3
```

12

#### 13 **Sources of experimental PDB structures**

14 The structure sources for the motif benchmark have been described previously. (Watkins et al.,  
15 2018) The structures for the FARNA benchmark are as follows:

16 PDB codes 157D (Leonard et al., 1994); 1A4D (Dallas and Moore, 1997); 1CSL (Ippolito and  
17 Steitz, 2000); 1DQF (Xiong and Sundaralingam, 2000); 1ESY (Amarasinghe et al., 2000); 1I9X  
18 (Berglund et al., 2001); 1KD5 (Kacer et al., 2003); 1KKA (Cabello-Villegas et al., 2002); 1L2X  
19 (Egli et al., 2002); 1MHK (Szép et al., 2003); 1Q9A (Correll et al., 2003); 1QWA (Finger et al.,  
20 2003), 1XJR (Robertson et al., 2005); 255D (Holbrook et al., 1991); 283D (Baeyens et al.,  
21 1996); 28SP (Schmitz et al., 1999); 2A43 (Pallan et al., 2005), 2F88 (Seetharaman et al., 2006).

22 The structures for the RNA-Puzzles benchmark are:

23 PDB codes 3MEI; 3MEI (Dibrov et al., 2011a); 3P59 (Dibrov et al., 2011b); 3OXE (Huang et  
24 al., 2010); 3V7E (Baird et al., 2012); 4P9R (Meyer et al., 2014); 4GXY (Peselis and Serganov,  
25 2012); 4R4V (Suslov et al., 2015); 4L81 (Trausch et al., 2014); 5KPY (Porter et al., 2017);  
26 4LCK (Zhang and Ferré-D'Amaré, 2013); 5LYU (Martinez-Zapien et al., 2017); 4QLM (Ren  
27 and Patel, 2014); 4XW7 (Trausch et al., 2015); 5DDP (Ren et al., 2015); 5DDO (Ren et al.,  
28 2015); 5DI4 (Mir et al., 2015); 5K7C (Ren et al., 2016); 5TPY (Akiyama et al., 2016); 5T5A  
29 (Liu et al., 2017); 5Y87 (Zheng et al., 2017), 5NWQ (Huang et al., 2017).

30 Structures used as templates in the blind predictions: 3P49 (Butler et al., 2011), 2YGH  
31 (Schroeder et al., 2011), 4TS2 (Warner et al., 2014), 1GID (Cate et al., 1996).

32

## 1 QUANTIFICATION AND STATISTICAL ANALYSIS

2

### 3 **Data analysis**

4 FARFAR2 simulations produce a compressed Rosetta-format file called a ‘silent file’  
5 representing each trajectory endpoint. These files may be turned into PDB-format coordinate  
6 files using a Rosetta executable, `extract_pdbs`. They also hold scoring information; each line  
7 beginning with `SCORE:` either describes what scoring terms were used in generating the silent file  
8 or the values for that particular structure. Using these ‘score-lines’, the programs `grep` and `awk`,  
9 and the GNU coreutils `sort` and `wc`, we sorted the silent file by total score and by RMSD, and  
10 thereby selected the best-RMSD structure, the best-score structure, and the best-RMSD structure  
11 from among the top 1% by RMSD. As an example, the following command sorts the ‘score-  
12 lines’ by total energy, takes the top 500 lines, re-sorts those lines by RMSD, and prints out the  
13 ‘tag’ of the best-RMSD structure from those top 500 by score.

```
14 grep "^SCORE:" farna_rebuild.out | grep -v description | sort -nk2 | head -n  
15 500 | sort -nk24 | head -n 1 | awk '{print $NF}'
```

16

17 The following Rosetta command will extract that specified model `$TAG` as a PDB file called  
18 `$TAG.pdb`.

```
19 extract_pdbs -in:file:silent farna_rebuild.out -tags $TAG
```

20

### 21 **Model selection**

22 In order to produce a selection of models for comparison to RNA-Puzzles submissions, we  
23 attempt a variety of clustering strategies. The following command line will cluster the lowest  
24 energy `$NN` models with a `$RR` Å radius:

```
25 rna_cluster -in:file:silent farna_rebuild.out -out:file:silent  
26 farna_rebuild.clustered.out -native 157d_orig_NATIVE_157d.pdb -nstruct $NN  
27 -cluster_radius $RR
```

28

29 We chose three values for `$NN`: 400 (the program default), 1% of the decoys, or 2% of the  
30 decoys. We also surveyed possible values for `$RR`: for constant values, we chose 2.0, 3.0, 5.0,  
31 and 7.0; we also employed an ‘adaptive’ clustering radius that responds to how tightly converged  
32 the top models are for a trajectory – for this radius, we chose 0.5, 1.0, or 1.5 times the average

1 pairwise RMSD among the top ten models for the run in question. A 5.0 Å radius and 400  
2 models were the original choice and also ended up being the best-performing choice by a slight  
3 margin.

4  
5 For comparisons with the original FARNA algorithm analysis of the FARFAR2-Classics  
6 benchmark, the above clustering command was used with  $\$_{NN} = 5000$  and  $\$_{RR} = 3.0$  (Das and  
7 Baker, 2007). For comparisons with the original SWM execution of the FARFAR2-Motifs  
8 benchmark, the above clustering command was used with  $\$_{NN} = 400$  and  $\$_{RR} = 2.0$  (Watkins et  
9 al., 2018).

10

### 11 **Measures of prediction accuracy**

12 We measure prediction accuracy in the benchmarks using heavy-atom root-mean-squared  
13 deviation (RMSD). RMSD is obtained by aligning the model structure to the native structure and  
14 taking the average distance between all heavy-atoms (i.e., non-hydrogens) in the structure.

15

### 16 **Translating RMSD thresholds**

17 The  $RMSD_{100}$  measure allows the comparison of RMSDs on different structure sizes by scaling  
18 to 100 residues (Carugo and Pongor, 2008):

$$19 \quad RMSD_{100}(n) = \frac{RMSD_n}{-1.3 + 0.5 \ln n}$$

20 An extension of this measure (Kappel and Das, 2019) permits scaling between any numbers of  
21 residues:

$$22 \quad RMSD_m(n) = RMSD_n \frac{-1.3 + 0.5 \ln m}{-1.3 + 0.5 \ln n}$$

23 We applied this to convert RMSD 4.0 Å (the threshold treated as ‘native-like’ in the original  
24 FARNA publication and used for the *FARFAR2-Classics* benchmark in this work) to a threshold  
25 for *FARFAR2-Puzzles*. The *FARFAR2-Classics* benchmark had a median length of 26 moving  
26 residues; the median *FARFAR2-Puzzles* case featured 71. Because of the presence of a few long  
27 RNA-Puzzle problems, we also separately considered 18 “short problems” with median 68  
28 moving residues, and 3 “long problems” with median 130 moving residues. Applying the above  
29 formula to convert (4.0 Å, 26) yields (9.2 Å, 71) or else (9.1 Å, 68); (13.8 Å, 130). We use the  
30 tighter 9.1 Å threshold for either “overall” or short problems alone; and 13.8 Å for the largest

1 three problems. These thresholds also corresponded well to visual assessment of whether models  
2 were ‘native-like’ for each of the size ranges (see, e.g., Figures 2, 4, and 5).

3

#### 4 DATA AND SOFTWARE AVAILABILITY

5 Applications for running FARFAR2 and scripts for working with PDB files for use with this  
6 algorithm are part of the Rosetta software suite, which is free for academic use  
7 (<https://rosettacommons.org>). FARFAR2 is available as a webserver on ROSIE at  
8 <https://rosie.rosettacommons.org/farfar2>. The scripts used to set up the benchmarks studied in  
9 this work are available at [https://github.com/DasLab/rna\\_benchmark](https://github.com/DasLab/rna_benchmark). The final raw dataset is  
10 deposited with Stanford Library’s PURL system at <https://purl.stanford.edu/wn364wz7925>.

11

#### 12 KEY RESOURCES TABLE

13

14 The key resources table has been provided as a separate attachment.
